# Supplementary material for: Observational study of vascular dementia in the Spanish elderly population according to type 2 diabetes status: trends in incidence, characteristics and outcomes (2004-2013)
Source: PubMed Central journal article supplement — BMJ Open. 2017 Aug 4;7(8):e016390. doi: 10.1136/bmjopen-2017-016390 (PMC5629725; doi:10.1136/bmjopen-2017-016390), 2017-08-04
Supplement: bmjopen-2017-016390.draft_revisions.pdf [file bmjopen-2017-016390.draft_revisions.pdf]

# BMJ Open

## Vascular dementia in the Spanish elderly population according to type 2 diabetes status: trends in incidence, characteristics and outcomes (2004-2013)

|                                 |                                                                                                                                                                                                                                                                                                                                                                                                                                                                                                                                                                                                                                                                                     |
|---------------------------------|-------------------------------------------------------------------------------------------------------------------------------------------------------------------------------------------------------------------------------------------------------------------------------------------------------------------------------------------------------------------------------------------------------------------------------------------------------------------------------------------------------------------------------------------------------------------------------------------------------------------------------------------------------------------------------------|
| Journal:                        | <i>BMJ Open</i>                                                                                                                                                                                                                                                                                                                                                                                                                                                                                                                                                                                                                                                                     |
| Manuscript ID                   | bmjopen-2017-016390                                                                                                                                                                                                                                                                                                                                                                                                                                                                                                                                                                                                                                                                 |
| Article Type:                   | Research                                                                                                                                                                                                                                                                                                                                                                                                                                                                                                                                                                                                                                                                            |
| Date Submitted by the Author:   | 10-Feb-2017                                                                                                                                                                                                                                                                                                                                                                                                                                                                                                                                                                                                                                                                         |
| Complete List of Authors:       | Muñoz-Rivas, Nuria; Hospital Universitario Infanta Leonor, Internal Medicine Department<br>Mendez-Bailon, Manuel; Hospital Clinico Universitario San Carlos, Internal Medicine Department<br>de Miguel-Yanes, Jose; Hospital General Universitario Gregorio Marañon, Internal Medicine Department<br>Hernandez-Barrera, Valentin; Universidad Rey Juan Carlos, Preventive Medicine and Public Health Teaching and Research Unit<br>de Miguel-Diez, Javier; Hospital General Universitario Gregorio Marañón, Jimenez-Garcia, Rodrigo; Univ Rey Juan Carlos,<br>Lopez-de-Andres, Ana ; Universidad Rey Juan Carlos, Preventive Medicine and Public Health Teaching and Research Unit. |
| <b>Primary Subject Heading</b>: | Epidemiology                                                                                                                                                                                                                                                                                                                                                                                                                                                                                                                                                                                                                                                                        |
| Secondary Subject Heading:      | Diabetes and endocrinology                                                                                                                                                                                                                                                                                                                                                                                                                                                                                                                                                                                                                                                          |
| Keywords:                       | Type 2 diabetes, Vascular dementia, Hospitalization, In-hospital mortality                                                                                                                                                                                                                                                                                                                                                                                                                                                                                                                                                                                                          |
|                                 |                                                                                                                                                                                                                                                                                                                                                                                                                                                                                                                                                                                                                                                                                     |

SCHOLARONE™  
Manuscripts

1  
2  
3 1 **Vascular dementia in the Spanish elderly population according to type 2 diabetes status:**  
4  
5 2 **trends in incidence, characteristics and outcomes (2004-2013)**  
6  
7 3

8  
9 4 Nuria Muñoz-Rivas<sup>1</sup>, Manuel Méndez-Bailón<sup>2</sup>, José M de Miguel-Yanes<sup>3</sup>, Valentín  
10  
11 5 Hernández-Barrera<sup>4</sup>, Javier de Miguel-Díez<sup>5</sup>, Rodrigo Jiménez-García<sup>4¶</sup>, Ana López-de-  
12  
13 6 Andrés<sup>4¶</sup>

14  
15  
16 7 <sup>1</sup>Internal Medicine Department. Hospital Universitario Infanta Leonor. Madrid. Spain.

17  
18 8 <sup>2</sup>Internal Medicine Department. Hospital Universitario Clínico San Carlos. Madrid. Spain.

19  
20 9 <sup>3</sup>Internal Medicine Department. Hospital General Universitario Gregorio Marañón. Madrid.  
21  
22 10 Spain

23  
24 11 <sup>4</sup>Preventive Medicine and Public Health Teaching and Research Unit. Health Sciences  
25  
26 12 Faculty. Rey Juan Carlos University. Madrid. Spain.

27  
28 13 <sup>5</sup>Respiratory Care Department, Hospital General Universitario Gregorio Marañón. Madrid.  
29  
30 14 Spain.

31  
32 15 ¶These authors contributed equally to this work.  
33

34  
35  
36 16  
37  
38 17 Address for correspondence:Rodrigo Jiménez-García. Preventive Medicine and Public Health  
39  
40 18 Teaching and Research Unit, Health Sciences Faculty, Rey Juan Carlos University Avda. de  
41  
42 19 Atenas s/n, 28922 Alcorcón, Madrid, Spain. Tel: +34 91 4888853. Fax: +34 91 4888848. E-  
43  
44 20 mail: [rodrigo.jimenez@urjc.es](mailto:rodrigo.jimenez@urjc.es)  
45  
46  
47 21

48  
49 22 **Key Words:** Type 2 diabetes; Vascular dementia; Hospitalization; In-hospital mortality  
50  
51 23

52  
53  
54 24 **Word count:** 3,075  
55  
56  
57  
58  
59  
60

1  
2  
3 **1 ABSTRACT**

4  
5 **2 Objectives:** To examine trends in the incidence and outcomes of vascular dementia (VaD)  
6  
7 hospitalizations in elderly patients with and without type 2 diabetes (T2DM) in Spain, 2004-  
8  
9 2013.

10  
11 **5 Design:** Retrospective study.

12  
13 **6 Setting:** Spain.

14  
15 **7 Participants:** We used national hospital discharge data to select all patients aged  $\geq 70$   
16  
17 discharged from a hospital with VaD as a primary diagnosis.

18  
19 **9 Main outcome measures:** Overall incidence was calculated and stratified by diabetes status  
20  
21 (T2DM or non-diabetic) and age groups. We analyzed diagnostic and therapeutic procedures,  
22  
23 patient comorbidities, infectious complications, length of hospital stays and in-hospital  
24  
25 mortality (IHM).  
26  
27

28  
29 **13 Results:** We identified a total of 170,607 admissions for VaD (34.3% with T2DM). The  
30  
31 adjusted incidence was higher among people with T2DM over the study period. We found a  
32  
33 higher incidence in men than women in all years studied. T2DM was positively associated  
34  
35 with VaD hospitalization (IRR 2.14, 95%CI 2.11-1.16). The mean age at admission was  
36  
37 higher than 80 years for all groups and more than 70% had a Charlson Comorbidity Index  
38  
39 value  $\geq 2$ . Pneumonia was significantly associated with a higher mortality (OR 2.59, 95%CI  
40  
41 2.52 -2.67). We found that percutaneous endoscopic gastrostomy was associated with lower  
42  
43 IHM (OR 0.37, 95%CI 0.31-0.45), while parenteral nutrition had the opposite effect (OR  
44  
45 1.29, 95%CI 1.18-1.41). Diabetes was not associated with higher IHM (OR 0.99, 95%CI  
46  
47 0.93–1.06). For the entire sample, time-trend analyses showed a significant decrease in  
48  
49 mortality in patients admitted for VaD (OR 0.98, 95%CI 0.97–0.99).  
50  
51

52  
53 **24 Conclusions:** Incidence rates for VaD hospitalizations were twice as high in diabetic patients  
54  
55 compared to non-diabetics. Men had significantly higher incidence rates than women,  
56  
57  
58

1  
2  
3 1 regardless of diabetes status. In both groups studied, pneumonia and parenteral nutrition were  
4  
5 2 associated with mortality while percutaneous endoscopic gastrostomy was associated with  
6  
7 3 survival. The presence of diabetes was not associated with higher IHM during hospitalization  
8  
9 4 with VaD.  
10  
11  
12 5

### 6 **Strengths and limitations of this study**

7

- 8
- 9 • The strength of our investigation lies in its large sample size, the 10-year follow-up  
10 period, and the standardized methodology.
  - 11 • A limitation is the lack of information on VaD or T2DM duration, treatments for this  
12 last condition or sociodemographic characteristic.
  - 13 • Another limitation is the lack of specificity of clinically defined VaD.
- 14

## 1 INTRODUCTION

2 Dementia has become a significant global economic, social, and public health burden. [1,2]

3 The most common types of dementia are vascular dementia (VaD) and Alzheimer's disease  
4 (AD), which together account for more than 90% of all cases. [1]

5 Several epidemiological studies have also demonstrated that diabetic patients are at an  
6 increased risk for stroke, lacunar infarcts, AD and VaD [3-5] through A $\beta$ /tau-dependent and  
7 independent mechanisms. [3]

8 Type 2 diabetes mellitus (T2DM), which affects more than 300 million people worldwide, [6]  
9 increases the risk of macrovascular and microvascular complications, and it is also an  
10 independent risk factor for vascular dementia [7,8] and AD. [9] It has recently been published  
11 that diabetic patients have a 60% greater risk for the development of dementia. [10] Factors  
12 reportedly linked with dementia include age, smoking, hypertension and diabetes, therefore it  
13 is only to be expected that hospitalization for VaD will increase in the coming years. [11,12]  
14 For this reason, it seems necessary to analyze the evolution of VaD over time and to evaluate  
15 which factors and procedures may increase in-hospital mortality (IHM).

16 In this study, we used national hospital discharge data to examine trends in the incidence of  
17 VaD among hospitalized men and women with and without T2DM between 2004 and 2013 in  
18 Spain. In particular, we analyzed trends in the use of diagnostic and therapeutic procedures,  
19 patient comorbidities, common infectious and medical complications and in-hospital  
20 outcomes such as length of hospital stay (LOHS), readmission rates and IHM.

## 21 METHODS

22 This retrospective, observational study was conducted using the Spanish National Hospital  
23 Database (CMBD, *Conjunto Minimo Básico de Datos*). [13] We selected all patients aged  $\geq 70$   
24 years hospitalized for VaD (ICD-9-CM codes: 290.40, 290.41, 290.42, 290.43) as the primary  
25 diagnosis between January 1, 2004 and December 31, 2013.

1 Discharges were grouped by diabetes status as follows: T2DM (codes: 250.x0; 250.x2) and no  
2 diabetes.

3 We calculated the adjusted incidence of discharge rates after VaD for men and women with  
4 and without T2DM per 100,000 inhabitants, as described in detail in the Supplementary  
5 Methods.

6 Clinical characteristics included information on overall comorbidity at the time of diagnosis,  
7 which was assessed by calculating the Charlson Comorbidity Index (CCI) [14] as described in  
8 detail in the Supplementary Methods.

9 We analyzed the presence of hypertension (codes: 401, 401.0, 401.1, 401.9) and atrial  
10 fibrillation (code: 427.31) in any diagnosis position during vascular dementia hospitalization.

11 We also identified common infectious complications such as pneumonia (codes: 480-488,  
12 507.0-507.8) and urinary tract infection (codes: 590.0, 590.9, 595.0, 595.9, 597.80, 599.0).

13 We analyzed other medical complications, specifically agitation (code: 307.9) and  
14 malnutrition (code: 263.9).

15 We identified the following diagnostic and therapeutic procedures: magnetic resonance (code:  
16 88.91), computed tomography angiography (CAT) (code: 87.03), percutaneous endoscopic  
17 gastrostomy (PEG) (code: 43.11), mechanical ventilation (codes: 96.7; 96.70; 96.71; 96.72),  
18 parenteral nutrition (codes: 99.15) and bladder catheterization (code: 57.94).

19 Patient readmissions were defined as inpatient re-hospitalization within 30 days of discharge  
20 (30-day readmission). The mean LOHS and the proportion of patients who died during the  
21 hospital admission, IHM, were also estimated for each year studied.

22 Statistical analysis is described in the Supplementary Methods.

## 23 **RESULTS**

24 We identified a total of 170,607 discharges of patients (78,499 men and 92,108 women)  
25 admitted with VaD as the primary diagnosis. Patients with T2DM accounted for 34.3% of the

1 total. The prevalence of T2DM in men with VaD increased significantly during the study  
2 period, from 28.94% in 2004 to 34.58% in 2013 ( $p<0.01$ ). The prevalence of diabetes in  
3 women with VaD increased from 34.13% to 35.37% ( $p<0.01$ ).

4 The overall adjusted incidence of admissions for VaD was higher among the oldest subgroup  
5 ( $\geq 85$  years), both in men and women, diabetic and non-diabetic. In T2DM patients older than  
6 85 years, we found that incidence rates were 1,369.63 per 100,000 inhabitants in women and  
7 1,308.71 per 100,000 inhabitants in men. In the non-diabetic group, incidence rates for men  
8 and women were 776.52 and 824.15 per 100,000 inhabitants, respectively (Supplementary  
9 Table).

10 The adjusted incidence rate of admissions for VaD increased significantly in men with T2DM  
11 aged  $\geq 85$  years old (1,191.79 cases per 100,000 inhabitants in 2004 to 1,393.17 cases in  
12 2013). However, there were no significant changes in the incidence of diagnosis of VaD in  
13 T2DM-women aged  $\geq 85$  years (Supplementary Table).

14 As can be seen in Table 1, the mean age was 80.72 years (SD, 5.65 years) in diabetic men and  
15 82.4 years (SD, 5.93 years) in men without diabetes. According to the CCI, 40.86% of men  
16 with T2DM had three or more coexisting conditions; in men without diabetes this figure was  
17 39.3%. The percentage of men with T2DM who have two or more coexisting conditions is  
18 slightly higher than that of non-diabetic men (81% vs. 79.71%)

1 **Table 1. Characteristic, Charlson Comorbidity Index and clinical conditions among men with and without type 2 diabetes hospitalized**  
2 **with vascular dementia. Analysis of the Spanish National Hospital Discharge Database from 2004 to 2013.**

|                                     | 2004        | 2005        | 2006        | 2007        | 2008        | 2009        | 2010        | 2011        | 2012        | 2013        | Total        | p-value |
|-------------------------------------|-------------|-------------|-------------|-------------|-------------|-------------|-------------|-------------|-------------|-------------|--------------|---------|
| No Diabetes                         |             |             |             |             |             |             |             |             |             |             |              |         |
| N                                   | 4185        | 4511        | 4697        | 4889        | 5152        | 5346        | 5705        | 5892        | 5877        | 6083        | 52337        | <0.001  |
| Incidence                           | 255.04      | 256.93      | 251.11      | 261.37      | 280.32      | 296.14      | 316.02      | 325.64      | 324.81      | 335.44      | 290.47       |         |
| Age, mean (SD)                      | 81.28(6.01) | 81.32(5.82) | 81.64(5.92) | 82(6.06)    | 81.9(5.95)  | 82.61(5.95) | 82.78(5.83) | 83.01(5.71) | 83.15(5.88) | 83.41(5.76) | 82.4(5.93)   | <0.001  |
| 70-74 years old, n (%)              | 626(14.96)  | 610(13.52)  | 572(12.18)  | 597(12.21)  | 630(12.23)  | 509(9.52)   | 513(8.99)   | 426(7.23)   | 491(8.35)   | 461(7.58)   | 5435(10.38)  | 0.000   |
| 75-79 years old, n (%)              | 1053(25.16) | 1154(25.58) | 1173(24.97) | 1132(23.15) | 1215(23.58) | 1167(21.83) | 1162(20.37) | 1223(20.76) | 1071(18.22) | 1075(17.67) | 11425(21.83) |         |
| 80-84 years old, n (%)              | 1247(29.8)  | 1413(31.32) | 1493(31.79) | 1490(30.48) | 1541(29.91) | 1556(29.11) | 1760(30.85) | 1839(31.21) | 1808(30.76) | 1878(30.87) | 16025(30.62) |         |
| ≥85 years old, n(%)                 | 1259(30.08) | 1334(29.57) | 1459(31.06) | 1670(34.16) | 1766(34.28) | 2114(39.54) | 2270(39.79) | 2404(40.8)  | 2507(42.66) | 2669(43.88) | 19452(37.17) |         |
| Charlson Comorbidity Index1, n (%)  | 934(22.32)  | 962(21.33)  | 1019(21.69) | 1015(20.76) | 1119(21.72) | 1124(21.03) | 1119(19.61) | 1113(18.89) | 1091(18.56) | 1126(18.51) | 10622(20.3)  | 0.000   |
| Charlson Comorbidity Index2, n (%)  | 1748(41.77) | 1968(43.63) | 1927(41.03) | 2048(41.89) | 2072(40.22) | 2195(41.06) | 2281(39.98) | 2330(39.55) | 2219(37.76) | 2359(38.78) | 21147(40.41) |         |
| Charlson Comorbidity Index≥3, n (%) | 1503(35.91) | 1581(35.05) | 1751(37.28) | 1826(37.35) | 1961(38.06) | 2027(37.92) | 2305(40.4)  | 2449(41.56) | 2567(43.68) | 2598(42.71) | 20568(39.3)  |         |
| Atrial fibrillation, n (%)          | 830(19.83)  | 907(20.11)  | 1030(21.93) | 1095(22.4)  | 1155(22.42) | 1270(23.76) | 1397(24.49) | 1452(24.64) | 1488(25.32) | 1493(24.54) | 12117(23.15) | <0.001  |
| Hypertension, n (%)                 | 1398(33.41) | 1537(34.07) | 1707(36.34) | 1745(35.69) | 1883(36.55) | 2004(37.49) | 2196(38.49) | 2288(38.83) | 2349(39.97) | 2420(39.78) | 19527(37.31) | <0.001  |
| Malnutrition, n (%)                 | 104(2.49)   | 177(3.92)   | 185(3.94)   | 231(4.72)   | 243(4.72)   | 274(5.13)   | 251(4.4)    | 308(5.23)   | 280(4.76)   | 339(5.57)   | 2392(4.57)   | <0.001  |
| Pneumonia, n (%)                    | 1028(24.56) | 1180(26.16) | 1136(24.19) | 1260(25.77) | 1303(25.29) | 1448(27.09) | 1526(26.75) | 1594(27.05) | 1603(27.28) | 1638(26.93) | 13716(26.21) | <0.001  |
| Urinary tract infection, n (%)      | 682(16.3)   | 743(16.47)  | 790(16.82)  | 808(16.53)  | 881(17.1)   | 963(18.01)  | 992(17.39)  | 1079(18.31) | 1108(18.85) | 1150(18.91) | 9196(17.57)  | 0.001   |
| Agitation, n (%)                    | 16(0.38)    | 16(0.35)    | 16(0.34)    | 24(0.49)    | 22(0.43)    | 31(0.58)    | 36(0.63)    | 34(0.58)    | 32(0.54)    | 39(0.64)    | 266(0.51)    | 0.225   |
| Diabetes                            |             |             |             |             |             |             |             |             |             |             |              |         |
| N                                   | 1703        | 2000        | 2297        | 2376        | 2578        | 2735        | 2887        | 3057        | 3313        | 3216        | 26162        | <0.001  |
| Incidence                           | 450.73      | 501.91      | 548.05      | 566.9       | 578.82      | 579.89      | 612.11      | 591.26      | 640.77      | 571.82      | 568.77       |         |
| Age, mean (SD)                      | 79.6(5.59)  | 79.74(5.58) | 79.84(5.57) | 80.2(5.6)   | 80.43(5.6)  | 80.51(5.65) | 81.01(5.46) | 81.37(5.62) | 81.49(5.65) | 81.71(5.66) | 80.72(5.65)  | <0.001  |
| 70-74 years old, n (%)              | 342(20.08)  | 393(19.65)  | 438(19.07)  | 400(16.84)  | 413(16.02)  | 426(15.58)  | 376(13.02)  | 388(12.69)  | 392(11.83)  | 352(10.95)  | 3920(14.98)  | 0.000   |
| 75-79 years old, n (%)              | 540(31.71)  | 621(31.05)  | 683(29.73)  | 752(31.65)  | 767(29.75)  | 791(28.92)  | 759(26.29)  | 789(25.81)  | 855(25.81)  | 811(25.22)  | 7368(28.16)  |         |
| 80-84 years old, n (%)              | 487(28.6)   | 599(29.95)  | 728(31.69)  | 669(28.16)  | 786(30.49)  | 855(31.26)  | 959(33.22)  | 939(30.72)  | 1048(31.63) | 1019(31.69) | 8089(30.92)  |         |
| ≥85 years old, n(%)                 | 334(19.61)  | 387(19.35)  | 448(19.5)   | 555(23.36)  | 612(23.74)  | 663(24.24)  | 793(27.47)  | 941(30.78)  | 1018(30.73) | 1034(32.15) | 6785(25.93)  |         |
| Charlson Comorbidity Index1, n (%)  | 348(20.43)  | 398(19.9)   | 490(21.33)  | 508(21.38)  | 509(19.74)  | 494(18.06)  | 513(17.77)  | 558(18.25)  | 594(17.93)  | 559(17.38)  | 4971(19)     | 0.000   |
| Charlson Comorbidity Index2, n (%)  | 710(41.69)  | 784(39.2)   | 925(40.27)  | 942(39.65)  | 1079(41.85) | 1095(40.04) | 1191(41.25) | 1200(39.25) | 1341(40.48) | 1234(38.37) | 10501(40.14) |         |
| Charlson Comorbidity Index≥3, n (%) | 645(37.87)  | 818(40.9)   | 882(38.4)   | 926(38.97)  | 990(38.4)   | 1146(41.9)  | 1183(40.98) | 1299(42.49) | 1378(41.59) | 1423(44.25) | 10690(40.86) |         |
| Atrial fibrillation, n (%)          | 319(18.73)  | 409(20.45)  | 443(19.29)  | 454(19.11)  | 521(20.21)  | 574(20.99)  | 591(20.47)  | 639(20.9)   | 700(21.13)  | 678(21.08)  | 5328(20.37)  | 0.331   |
| Hypertension, n (%)                 | 780(45.8)   | 945(47.25)  | 1087(47.32) | 1201(50.55) | 1303(50.54) | 1410(51.55) | 1456(50.43) | 1517(49.62) | 1653(49.89) | 1647(51.21) | 12999(49.69) | 0.001   |
| Malnutrition, n (%)                 | 41(2.41)    | 58(2.9)     | 85(3.7)     | 73(3.07)    | 81(3.14)    | 110(4.02)   | 127(4.4)    | 121(3.96)   | 127(3.83)   | 117(3.64)   | 940(3.59)    | 0.010   |
| Pneumonia, n (%)                    | 390(22.9)   | 431(21.55)  | 490(21.33)  | 536(22.56)  | 599(23.24)  | 651(23.8)   | 706(24.45)  | 768(25.12)  | 804(24.27)  | 763(23.73)  | 6138(23.46)  | 0.024   |
| Urinary tract infection, n (%)      | 299(17.56)  | 335(16.75)  | 351(15.28)  | 392(16.5)   | 449(17.42)  | 500(18.28)  | 520(18.01)  | 578(18.91)  | 580(17.51)  | 573(17.82)  | 4577(17.49)  | 0.059   |
| Agitation, n (%)                    | 6(0.35)     | 6(0.3)      | 6(0.26)     | 4(0.17)     | 10(0.39)    | 14(0.51)    | 13(0.45)    | 13(0.43)    | 20(0.6)     | 19(0.59)    | 111(0.42)    | 0.254   |

3 *N: Number of discharges; Incidence: per 100,000 inhabitants; Comorbidities included in the Charlson comorbidity index, except diabetes and dementia. P value for*  
4 *comparison by year. Poisson regression model for incidence rates, ANOVA for means, Pearson's chi-square for proportions.*



1 Hypertension was significantly more prevalent in diabetic men than in those without diabetes  
2 (49.69% and 37.31%, respectively), but atrial fibrillation, malnutrition, pneumonia and  
3 agitation were more frequent in non-diabetic men (Table 1).

4 The estimated adjusted incidence of discharges due to VaD in men with diabetes increased  
5 significantly from 450.73 cases in 2004 to 571.82 cases per 100,000 diabetic men in 2013. In  
6 the men without diabetes, the incidence rate increased significantly from 255.04 cases in 2004  
7 to 335.44 cases per 100,000 non-diabetic patients in 2013. The incidences were higher among  
8 men with diabetes than those without diabetes in all the years studied (Table 1).

9 As can be seen in Table 1, for both groups studied, a significant increase in the mean age,  
10 higher values of CCI and an increase in the prevalence of hypertension were observed over  
11 the study period.

12 We found that the proportion of patients with malnutrition has significantly increased over  
13 time, ranging from 2.49% in 2004 to 5.57% in 2013 in men without T2DM, and from 2.41%  
14 to 3.64% in those with diabetes over the study period ( $p<0.05$ ). In both diabetic and non-  
15 diabetic men, we found that pneumonia increased significantly over time. In non-diabetic  
16 men, urinary tract infections increased from 16.3% to 18.91% ( $p<0.05$ ); however, in diabetic  
17 men this infectious complication remained stable. Agitation has remained stable over time in  
18 both groups (Table 1).

19 Over the study period, 54% of all VaD hospitalizations were women. The mean age for  
20 women with T2DM was significantly lower than in those without diabetes (83.17 years vs.  
21 85.01 years). Women with T2DM had higher CCI values compared to those without diabetes  
22 (29.21% and 26.8% with three or more coexisting conditions, respectively) (Table 2).

1 **Table 2. Characteristic, Charlson Comorbidity Index and clinical conditions among women with and without type 2 diabetes**  
2 **hospitalized with vascular dementia. Analysis of the Spanish National Hospital Discharge Database from 2004 to 2013.**

|                                     | 2004        | 2005        | 2006        | 2007        | 2008        | 2009        | 2010        | 2011        | 2012        | 2013        | Total        | p-value |
|-------------------------------------|-------------|-------------|-------------|-------------|-------------|-------------|-------------|-------------|-------------|-------------|--------------|---------|
| No Diabetes                         |             |             |             |             |             |             |             |             |             |             |              |         |
| N                                   | 4489        | 5089        | 5018        | 5313        | 6007        | 6066        | 6448        | 6881        | 7167        | 7124        | 59602        | <0.001  |
| Incidence                           | 192.92      | 210.3       | 199.7       | 211.44      | 234.61      | 232.59      | 247.23      | 260.71      | 271.55      | 266.76      | 233.75       |         |
| Age, mean (SD)                      | 83.93(6.01) | 84.19(5.99) | 84.27(6.07) | 84.59(5.94) | 84.76(5.95) | 85.16(5.88) | 85.24(5.87) | 85.54(5.75) | 85.65(5.69) | 85.88(5.79) | 85.01(5.91)  | <0.001  |
| 70-74 years old, n (%)              | 340(7.57)   | 310(6.09)   | 328(6.54)   | 293(5.51)   | 289(4.81)   | 266(4.39)   | 260(4.03)   | 220(3.2)    | 246(3.43)   | 214(3)      | 2766(4.64)   | <0.001  |
| 75-79 years old, n (%)              | 693(15.44)  | 813(15.98)  | 770(15.34)  | 761(14.32)  | 879(14.63)  | 782(12.89)  | 844(13.09)  | 854(12.41)  | 787(10.98)  | 794(11.15)  | 7977(13.38)  |         |
| 80-84 years old, n (%)              | 1337(29.78) | 1486(29.2)  | 1465(29.19) | 1544(29.06) | 1669(27.78) | 1609(26.52) | 1657(25.7)  | 1718(24.97) | 1861(25.97) | 1758(24.68) | 16104(27.02) |         |
| ≥85 years old, n(%)                 | 2119(47.2)  | 2480(48.73) | 2455(48.92) | 2715(51.1)  | 3170(52.77) | 3409(56.2)  | 3687(57.18) | 4089(59.42) | 4273(59.62) | 4358(61.17) | 32755(54.96) |         |
| Charlson Comorbidity Index1, n (%)  | 1346(29.98) | 1640(32.23) | 1565(31.19) | 1615(30.4)  | 1849(30.78) | 1746(28.78) | 1736(26.92) | 1808(26.28) | 1913(26.69) | 1772(24.87) | 16990(28.51) | <0.001  |
| Charlson Comorbidity Index2, n (%)  | 2065(46)    | 2264(44.49) | 2242(44.68) | 2382(44.83) | 2656(44.22) | 2734(45.07) | 2957(45.86) | 3093(44.95) | 3112(43.42) | 3131(43.95) | 26636(44.69) |         |
| Charlson Comorbidity Index≥3, n (%) | 1078(24.01) | 1185(23.29) | 1211(24.13) | 1316(24.77) | 1502(25)    | 1586(26.15) | 1755(27.22) | 1980(28.77) | 2142(29.89) | 2221(31.18) | 15976(26.8)  |         |
| Atrial fibrillation, n (%)          | 1185(26.4)  | 1311(25.76) | 1368(27.26) | 1447(27.24) | 1645(27.38) | 1634(26.94) | 1799(27.9)  | 2015(29.28) | 2068(28.85) | 2021(28.37) | 16493(27.67) | <0.001  |
| Hypertension, n (%)                 | 1889(42.08) | 2160(42.44) | 2196(43.76) | 2461(46.32) | 2759(45.93) | 2945(48.55) | 2988(46.34) | 3197(46.46) | 3409(47.57) | 3441(48.3)  | 27445(46.05) | <0.001  |
| Malnutrition, n (%)                 | 152(3.39)   | 205(4.03)   | 231(4.6)    | 231(4.35)   | 301(5.01)   | 317(5.23)   | 352(5.46)   | 381(5.54)   | 365(5.09)   | 406(5.7)    | 2941(4.93)   | <0.001  |
| Pneumonia, n (%)                    | 783(17.44)  | 988(19.41)  | 898(17.9)   | 916(17.24)  | 1162(19.34) | 1180(19.45) | 1252(19.42) | 1299(18.88) | 1442(20.12) | 1350(18.95) | 11270(18.91) | <0.001  |
| Urinary tract infection, n (%)      | 871(19.4)   | 999(19.63)  | 1077(21.46) | 1070(20.14) | 1308(21.77) | 1394(22.98) | 1475(22.88) | 1634(23.75) | 1565(21.84) | 1681(23.6)  | 13074(21.94) | <0.001  |
| Agitation, n (%)                    | 13(0.29)    | 18(0.35)    | 19(0.38)    | 15(0.28)    | 27(0.45)    | 20(0.33)    | 21(0.33)    | 41(0.6)     | 21(0.29)    | 31(0.44)    | 226(0.38)    | 0.103   |
| Diabetes                            |             |             |             |             |             |             |             |             |             |             |              |         |
| N                                   | 2326        | 2553        | 2852        | 2920        | 3192        | 3525        | 3546        | 3841        | 3852        | 3899        | 32506        | <0.001  |
| Incidence                           | 410.63      | 457.16      | 518.13      | 530.48      | 533.07      | 544.7       | 547.95      | 524.92      | 526.42      | 477.63      | 508.01       |         |
| Age, mean (SD)                      | 82.01(5.83) | 82.21(6.07) | 82.43(6.06) | 82.75(6)    | 83.12(6)    | 83.16(5.85) | 83.35(5.75) | 83.72(5.87) | 83.68(5.78) | 84.15(5.77) | 83.17(5.92)  | <0.001  |
| 70-74 years old, n (%)              | 270(11.61)  | 287(11.24)  | 297(10.41)  | 292(10)     | 279(8.74)   | 298(8.45)   | 242(6.82)   | 243(6.33)   | 254(6.59)   | 220(5.64)   | 2682(8.25)   | <0.001  |
| 75-79 years old, n (%)              | 530(22.79)  | 584(22.88)  | 634(22.23)  | 582(19.93)  | 645(20.21)  | 667(18.92)  | 692(19.51)  | 710(18.48)  | 669(17.37)  | 600(15.39)  | 6313(19.42)  |         |
| 80-84 years old, n (%)              | 742(31.9)   | 775(30.36)  | 862(30.22)  | 879(30.1)   | 911(28.54)  | 1063(30.16) | 1093(30.82) | 1144(29.78) | 1165(30.24) | 1179(30.24) | 9813(30.19)  |         |
| ≥85 years old, n(%)                 | 784(33.71)  | 907(35.53)  | 1059(37.13) | 1167(39.97) | 1357(42.51) | 1497(42.47) | 1519(42.84) | 1744(45.4)  | 1764(45.79) | 1900(48.73) | 13698(42.14) |         |
| Charlson Comorbidity Index1, n (%)  | 638(27.43)  | 694(27.18)  | 776(27.21)  | 809(27.71)  | 854(26.75)  | 971(27.55)  | 934(26.34)  | 949(24.71)  | 998(25.91)  | 931(23.88)  | 8554(26.32)  | <0.001  |
| Charlson Comorbidity Index2, n (%)  | 1064(45.74) | 1180(46.22) | 1269(44.5)  | 1307(44.76) | 1434(44.92) | 1610(45.67) | 1599(45.09) | 1701(44.29) | 1632(42.37) | 1660(42.58) | 14456(44.47) |         |
| Charlson Comorbidity Index≥3, n (%) | 624(26.83)  | 679(26.6)   | 807(28.3)   | 804(27.53)  | 904(28.32)  | 944(26.78)  | 1013(28.57) | 1191(31.01) | 1222(31.72) | 1308(33.55) | 9496(29.21)  |         |
| Atrial fibrillation, n (%)          | 594(25.54)  | 671(26.28)  | 747(26.19)  | 798(27.33)  | 880(27.57)  | 932(26.44)  | 920(25.94)  | 977(25.44)  | 1059(27.49) | 1118(28.67) | 8696(26.75)  | 0.045   |
| Hypertension, n (%)                 | 1237(53.18) | 1429(55.97) | 1643(57.61) | 1672(57.26) | 1871(58.62) | 2106(59.74) | 2077(58.57) | 2159(56.21) | 2180(56.59) | 2177(55.83) | 18551(57.07) | 0.000   |
| Malnutrition, n (%)                 | 41(1.76)    | 82(3.21)    | 105(3.68)   | 107(3.66)   | 123(3.85)   | 163(4.62)   | 126(3.55)   | 173(4.5)    | 167(4.34)   | 162(4.15)   | 1249(3.84)   | 0.000   |
| Pneumonia, n (%)                    | 342(14.7)   | 385(15.08)  | 420(14.73)  | 457(15.65)  | 529(16.57)  | 634(17.99)  | 584(16.47)  | 607(15.8)   | 631(16.38)  | 650(16.67)  | 5239(16.12)  | 0.011   |
| Urinary tract infection, n (%)      | 518(22.27)  | 592(23.19)  | 720(25.25)  | 703(24.08)  | 814(25.5)   | 920(26.1)   | 879(24.79)  | 966(25.15)  | 971(25.21)  | 962(24.67)  | 8045(24.75)  | 0.044   |
| Agitation, n (%)                    | 4(0.17)     | 8(0.31)     | 4(0.14)     | 7(0.24)     | 12(0.38)    | 6(0.17)     | 9(0.25)     | 16(0.42)    | 9(0.23)     | 16(0.41)    | 91(0.28)     | 0.266   |

3 *N: Number of discharges; Incidence: per 100,000 inhabitants; Comorbidities included in the Charlson comorbidity index, except diabetes and dementia. P value for*  
4 *comparison by year. Poisson regression model for incidence rates, ANOVA for means, Pearson's chi-square for proportions.*

1 Hypertension was more frequent in women with diabetes than in women without T2DM  
2 (57.07% vs. 46.05%). However, the prevalence of atrial fibrillation was slightly higher in  
3 non-diabetic women than in diabetic ones (27.67% vs. 26.75%) (Table 2).

4 As can be seen in Table 2, the incidence rate of hospitalization among women with T2DM  
5 increased significantly, from 410.63 cases per 100,000 diabetic women in 2004 to 477.63  
6 cases in 2013. Incidence rates also increased from 192.92 cases per 100,000 in 2003 to 266.76  
7 cases in 2013 ( $p < 0.05$ ) among non-diabetic women. As seen with men, rates were consistently  
8 higher in diabetic women.

9 A significant increase in the mean age, comorbidity, hypertension and in the prevalence of  
10 atrial fibrillation was observed in women with and without diabetes over the study period. We  
11 found an increase in the prevalence of malnutrition, pneumonia and urinary tract infections  
12 during hospitalization in both diabetic and non-diabetic women (Table 2).

13 If we compare diabetic men with diabetic women, we find that men have a higher adjusted  
14 incidence rate than women in all years analyzed. Diabetic men are significantly younger  
15 (80.72 vs. 83.17 years) and have a CCI  $\geq 3$ , (40.86% vs. 29.21%) in greater proportion than  
16 women over the study period. On the other hand, diabetic women showed more atrial  
17 fibrillation (26.75% vs. 20.37%) and hypertension (57.07% vs. 49.69%) than diabetic men.

18 The IHM among men with or without T2DM did not change significantly over the period of  
19 study, ranging from 16.62% to 14.49% in diabetic patients and from 17.08% to 16.29% in  
20 non-diabetic patients (Table 3).

**Table 3. Hospitalizations outcomes, diagnosis and therapeutic procedures among men with and without type 2 diabetes hospitalized with vascular dementia. Analysis of the Spanish National Hospital Discharge Database from 2004 to 2013.**

|                                | 2004        | 2005        | 2006        | 2007        | 2008        | 2009       | 2010        | 2011        | 2012        | 2013        | Total       | p-value |
|--------------------------------|-------------|-------------|-------------|-------------|-------------|------------|-------------|-------------|-------------|-------------|-------------|---------|
| No Diabetes                    |             |             |             |             |             |            |             |             |             |             |             |         |
| In hospital mortality, n (%)   | 715(17.08)  | 770(17.07)  | 787(16.76)  | 817(16.71)  | 834(16.19)  | 847(15.84) | 902(15.81)  | 974(16.53)  | 1024(17.42) | 991(16.29)  | 8661(16.55) | 0.334   |
| LOHS, median (IQR)             | 9(9)        | 8(10)       | 8(9)        | 8(9)        | 8(9)        | 8(9)       | 8(9)        | 8(9)        | 7(8)        | 7(8)        | 8(9)        | <0.001  |
| Readmission, n (%)             | 589(14.07)  | 654(14.5)   | 725(15.44)  | 767(15.69)  | 824(15.99)  | 875(16.37) | 896(15.71)  | 975(16.55)  | 899(15.3)   | 891(14.65)  | 8095(15.47) | 0.007   |
| CAT, n (%)                     | 1097(26.21) | 1061(23.52) | 1089(23.19) | 1135(23.22) | 1189(23.08) | 1251(23.4) | 1283(22.49) | 1330(22.57) | 1250(21.27) | 1298(21.34) | 11983(22.9) | <0.001  |
| Magnetic Resonance, n (%)      | 135(3.23)   | 146(3.24)   | 128(2.73)   | 164(3.35)   | 193(3.75)   | 178(3.33)  | 208(3.65)   | 193(3.28)   | 179(3.05)   | 179(2.94)   | 1703(3.25)  | 0.127   |
| PEG, n (%)                     | 36(0.86)    | 42(0.93)    | 38(0.81)    | 35(0.72)    | 43(0.83)    | 61(1.14)   | 65(1.14)    | 50(0.85)    | 50(0.85)    | 55(0.9)     | 475(0.91)   | 0.348   |
| Parenteral nutrition, n (%)    | 71(1.7)     | 79(1.75)    | 81(1.72)    | 79(1.62)    | 98(1.9)     | 86(1.61)   | 99(1.74)    | 100(1.7)    | 94(1.6)     | 121(1.99)   | 908(1.73)   | 0.853   |
| Mechanical ventilation, n (%)  | 32(0.76)    | 28(0.62)    | 39(0.83)    | 42(0.86)    | 50(0.97)    | 52(0.97)   | 81(1.42)    | 93(1.58)    | 129(2.19)   | 105(1.73)   | 651(1.24)   | <0.001  |
| Bladder Catheterization, n (%) | 145(3.46)   | 147(3.26)   | 174(3.7)    | 195(3.99)   | 242(4.7)    | 273(5.11)  | 267(4.68)   | 295(5.01)   | 327(5.56)   | 338(5.56)   | 2403(4.59)  | <0.001  |
| Diabetes                       |             |             |             |             |             |            |             |             |             |             |             |         |
| In hospital mortality, n (%)   | 283(16.62)  | 327(16.35)  | 369(16.06)  | 373(15.7)   | 373(14.47)  | 419(15.32) | 447(15.48)  | 469(15.34)  | 476(14.37)  | 466(14.49)  | 4002(15.3)  | 0.303   |
| LOHS, median (IQR)             | 8(9)        | 9(9)        | 8(9)        | 8(9)        | 8(9)        | 8(9)       | 8(9)        | 7(8)        | 7(8)        | 7(8)        | 8(9)        | <0.001  |
| Readmission, n (%)             | 288(16.91)  | 358(17.9)   | 407(17.72)  | 416(17.51)  | 433(16.8)   | 481(17.59) | 493(17.08)  | 555(18.16)  | 556(16.78)  | 518(16.11)  | 4505(17.22) | 0.633   |
| CAT, n (%)                     | 433(25.43)  | 518(25.9)   | 568(24.73)  | 538(22.64)  | 603(23.39)  | 665(24.31) | 673(23.31)  | 732(23.95)  | 756(22.82)  | 775(24.1)   | 6261(23.93) | 0.169   |
| Magnetic Resonance, n (%)      | 60(3.52)    | 81(4.05)    | 96(4.18)    | 81(3.41)    | 105(4.07)   | 107(3.91)  | 117(4.05)   | 114(3.73)   | 108(3.26)   | 109(3.39)   | 978(3.74)   | 0.561   |
| PEG, n (%)                     | 9(0.53)     | 16(0.8)     | 15(0.65)    | 11(0.46)    | 21(0.81)    | 24(0.88)   | 14(0.48)    | 29(0.95)    | 28(0.85)    | 38(1.18)    | 205(0.78)   | 0.057   |
| Parenteral nutrition, n (%)    | 31(1.82)    | 29(1.45)    | 33(1.44)    | 37(1.56)    | 30(1.16)    | 44(1.61)   | 55(1.91)    | 31(1.01)    | 51(1.54)    | 59(1.83)    | 400(1.53)   | 0.134   |
| Mechanical ventilation, n (%)  | 7(0.41)     | 14(0.7)     | 20(0.87)    | 17(0.72)    | 28(1.09)    | 31(1.13)   | 33(1.14)    | 46(1.5)     | 63(1.9)     | 40(1.24)    | 299(1.14)   | <0.001  |
| Bladder Catheterization, n (%) | 48(2.82)    | 77(3.85)    | 68(2.96)    | 110(4.63)   | 88(3.41)    | 117(4.28)  | 132(4.57)   | 168(5.5)    | 156(4.71)   | 183(5.69)   | 1147(4.38)  | <0.001  |

LOHS: length of hospital stay; CAT: Computed tomography angiography; PEG: Percutaneous Endoscopic Gastrostomy. P value for comparison by year: Binary logistic regression for incidence, Kruskal-Wallis for medians, Pearson's chi-square for proportions.

1  
2  
3 1 The mean LOHS decreased significantly from 9 days in 2004 to 7 days in 2013 in non-  
4  
5 2 diabetic men and from 8 to 7 days in diabetic men ( $p<0.05$ ). Readmissions remained stable  
6  
7 3 approximately 17% over time for diabetic patients, while they slightly increased in non-  
8  
9 4 diabetic men ranging from 14.07% in 2004 to 14.65% in 2013 ( $p<0.05$ ).

10  
11 5 As can be seen in Table 3, a significant increase in the use of bladder catheterization was  
12  
13 6 found in diabetic men, raising from 2.82% in 2004 to 5.69% in 2013, and from 3.46% to  
14  
15 7 5.56% in the same period among those without the disease. The use of PEG has remained  
16  
17 8 stable at approximately 1% of hospitalizations due to VaD, both in diabetic and non-diabetic  
18  
19 9 patients. However, there has been a significant increase in the use of mechanical ventilation in  
20  
21 10 diabetic and non-diabetic men, ranging from 0.41% and 0.76% in 2004 to 1.24% and 1.73%  
22  
23 11 in 2013, respectively.

24  
25  
26  
27 12 Of the diagnostic procedures analyzed, the most commonly used was CAT (22.9% in non-  
28  
29 13 diabetic men and 23.93% in diabetic ones) followed by magnetic resonance (3.25% and  
30  
31 14 3.74%, respectively). The use of CAT in non-diabetic men has significantly decreased, while  
32  
33 15 it has remained stable in diabetic men over the study period.

34  
35  
36 16 The IHM among diabetic women with a VaD discharge did not change significantly over the  
37  
38 17 study period, as can be seen in Table 4. However, in women without diabetes the IHM  
39  
40 18 decreased significantly from 16.08% in 2004 to 14.42% in 2013. Over the 10-year study  
41  
42 19 period, the LOHS in women with and without diabetes decreased significantly ( $p<0.05$ ). We  
43  
44 20 found that readmissions significantly increased in non-diabetic women, ranging from 11.63%  
45  
46 21 in 2004 to 13.64% in 2013, while it remained stable over time for diabetic women.

**Table 4. Hospitalizations outcomes, diagnosis and therapeutic procedures among women with and without type 2 diabetes hospitalized with vascular dementia. Analysis of the Spanish National Hospital Discharge Database from 2004 to 2013.**

|                                | 2004       | 2005        | 2006        | 2007        | 2008        | 2009        | 2010        | 2011        | 2012        | 2013        | Total        | p-value |
|--------------------------------|------------|-------------|-------------|-------------|-------------|-------------|-------------|-------------|-------------|-------------|--------------|---------|
| No Diabetes                    |            |             |             |             |             |             |             |             |             |             |              |         |
| In hospital mortality, n (%)   | 722(16.08) | 846(16.62)  | 747(14.89)  | 772(14.53)  | 947(15.76)  | 928(15.3)   | 920(14.27)  | 1042(15.14) | 1085(15.14) | 1027(14.42) | 9036(15.16)  | 0.008   |
| LOHS, median (IQR)             | 8(9)       | 8(9)        | 8(9)        | 8(9)        | 8(9)        | 8(9)        | 7(9)        | 7(8)        | 7(7)        | 7(7)        | 8(9)         | <0.001  |
| Readmission, n (%)             | 522(11.63) | 591(11.61)  | 641(12.77)  | 686(12.91)  | 779(12.97)  | 769(12.68)  | 910(14.11)  | 963(14)     | 1026(14.32) | 972(13.64)  | 7859(13.19)  | <0.001  |
| CAT, n (%)                     | 1109(24.7) | 1182(23.23) | 1214(24.19) | 1280(24.09) | 1364(22.71) | 1338(22.06) | 1503(23.31) | 1525(22.16) | 1497(20.89) | 1570(22.04) | 13582(22.79) | <0.001  |
| Magnetic Resonance, n (%)      | 118(2.63)  | 120(2.36)   | 120(2.39)   | 136(2.56)   | 178(2.96)   | 165(2.72)   | 150(2.33)   | 202(2.94)   | 147(2.05)   | 181(2.54)   | 1517(2.55)   | 0.027   |
| PEG, n (%)                     | 47(1.05)   | 45(0.88)    | 48(0.96)    | 54(1.02)    | 57(0.95)    | 67(1.1)     | 77(1.19)    | 64(0.93)    | 93(1.3)     | 51(0.72)    | 603(1.01)    | 0.058   |
| Parenteral nutrition, n (%)    | 76(1.69)   | 105(2.06)   | 116(2.31)   | 106(2)      | 110(1.83)   | 134(2.21)   | 133(2.06)   | 133(1.93)   | 134(1.87)   | 126(1.77)   | 1173(1.97)   | 0.378   |
| Mechanical ventilation, n (%)  | 30(0.67)   | 20(0.39)    | 27(0.54)    | 23(0.43)    | 35(0.58)    | 43(0.71)    | 51(0.79)    | 91(1.32)    | 106(1.48)   | 96(1.35)    | 522(0.88)    | <0.001  |
| Bladder Catheterization, n (%) | 79(1.76)   | 97(1.91)    | 126(2.51)   | 147(2.77)   | 168(2.8)    | 192(3.17)   | 229(3.55)   | 241(3.5)    | 222(3.1)    | 275(3.86)   | 1776(2.98)   | <0.001  |
| Diabetes                       |            |             |             |             |             |             |             |             |             |             |              |         |
| In hospital mortality, n (%)   | 343(14.75) | 383(15)     | 408(14.31)  | 447(15.31)  | 452(14.16)  | 516(14.64)  | 484(13.65)  | 530(13.8)   | 562(14.59)  | 541(13.88)  | 4666(14.35)  | 0.641   |
| LOHS, median (IQR)             | 8(9)       | 8(9)        | 8(9)        | 8(9)        | 8(9)        | 8(8)        | 7(9)        | 7(8)        | 7(7)        | 7(7)        | 8(9)         | <0.001  |
| Readmission, n (%)             | 314(13.5)  | 370(14.49)  | 433(15.18)  | 452(15.48)  | 503(15.76)  | 594(16.85)  | 548(15.45)  | 625(16.27)  | 612(15.89)  | 594(15.23)  | 5045(15.52)  | 0.641   |
| CAT, n (%)                     | 625(26.87) | 650(25.46)  | 737(25.84)  | 728(24.93)  | 802(25.13)  | 838(23.77)  | 819(23.1)   | 955(24.86)  | 805(20.9)   | 869(22.29)  | 7828(24.08)  | <0.001  |
| Magnetic Resonance, n (%)      | 49(2.11)   | 52(2.04)    | 81(2.84)    | 55(1.88)    | 86(2.69)    | 97(2.75)    | 101(2.85)   | 118(3.07)   | 98(2.54)    | 91(2.33)    | 828(2.55)    | 0.037   |
| PEG, n (%)                     | 22(0.95)   | 22(0.86)    | 20(0.7)     | 32(1.1)     | 31(0.97)    | 37(1.05)    | 43(1.21)    | 34(0.89)    | 39(1.01)    | 24(0.62)    | 304(0.94)    | 0.290   |
| Parenteral nutrition, n (%)    | 63(2.71)   | 63(2.47)    | 72(2.52)    | 43(1.47)    | 66(2.07)    | 79(2.24)    | 59(1.66)    | 81(2.11)    | 60(1.56)    | 65(1.67)    | 651(2)       | 0.002   |
| Mechanical ventilation, n (%)  | 9(0.39)    | 12(0.47)    | 17(0.6)     | 14(0.48)    | 21(0.66)    | 28(0.79)    | 41(1.16)    | 63(1.64)    | 54(1.4)     | 41(1.05)    | 300(0.92)    | <0.001  |
| Bladder Catheterization, n (%) | 58(2.49)   | 58(2.27)    | 71(2.49)    | 90(3.08)    | 87(2.73)    | 105(2.98)   | 106(2.99)   | 139(3.62)   | 138(3.58)   | 163(4.18)   | 1015(3.12)   | <0.001  |

LOHS: length of hospital stay; CAT: Computed tomography angiography; PEG: Percutaneous Endoscopic Gastrostomy. P value for comparison by year: Binary logistic regression for incidence, Kruskal-Wallis for medians, Pearson's chi-square for proportions.

1  
2  
3 As observed for men, we found a significant increase in the use of mechanical ventilation,  
4 from 0.39% to 1.05% in diabetic women and from 0.67% to 1.35% in non-diabetic women  
5 with VaD over the study period. The most commonly used diagnostic procedure was CAT for  
6 both groups of women. However, it was used in a higher proportion among those women  
7 with rather than without diabetes in all the years studied. The use of magnetic resonance has  
8 increased in diabetic women over time.

9  
10  
11  
12  
13  
14  
15  
16 When we compared hospitalization outcomes between diabetic men and women, we found  
17 higher crude IHM among men than women in the total study population (15.3% vs. 14.35%),  
18 in all the years studied. Readmission rates were also significantly higher among men than  
19 women (17.22% vs. 15.52%). The use of magnetic resonance was used in a significantly  
20 higher proportion of diabetic men than diabetic women (3.74% vs. 2.55%), and PEG was  
21 more frequently used among diabetic women (0.94% vs. 0.78%).

22  
23  
24  
25  
26  
27  
28  
29  
30 The Poisson regression models conducted to assess the effect of the disease on the incidence  
31 of VaD hospitalizations from 2004 to 2013 in Spain, yielded an IRR for men with T2DM of  
32 2.14 (95% CI 2.11-1.16). This means that, after adjusting for possible confounders, the  
33 incidence among diabetic men was 2-fold higher than among non-diabetic men. The  
34 corresponding figure for women was 0.75 (95% CI 0.74-0.76).

35  
36  
37  
38  
39  
40  
41 As can be seen in Table 5, among men and women with diabetes, IHM was significantly  
42 greater in older subjects (OR 1.48; 95% CI 1.38-1.59 and OR 1.54; 95% CI 1.40-1.69 in  $\geq 85$   
43 aged group compared with reference category of 70-74 years, respectively). IHM was  
44 significantly higher in diabetic men and women with more comorbidities (OR 1.35; 95% CI,  
45 1.27-1.42 and OR 1.62; 95% CI, 1.54-1.70 for those men and women with  $\geq 3$  comorbidities).  
46  
47  
48  
49  
50  
51  
52  
53  
54  
55  
56  
57  
58  
59  
60  
IHM was also significantly higher in those men and women with pneumonia (OR 2.5; 95%  
CI, 2.44-2.65 and OR 2.64; 95% CI, 2.53-2.75) and in those with atrial fibrillation (OR 1.15;  
95% CI, 1.09-1.20 and OR 1.21; 95% CI 1.16-1.26, respectively).

**Table 5. Factors associated to in hospital mortality among men and women with and without type 2 diabetes hospitalized with vascular dementia. Analysis of the Spanish National Hospital Discharge Database from 2004 to 2013.**

|                            |               | Men             | Woman           | BOTH             |
|----------------------------|---------------|-----------------|-----------------|------------------|
|                            |               | OR (95CI%)      | OR (95CI%)      | OR (95CI%)       |
| Sex                        | Men           | NA              | NA              | 1.01(0.98-1.04)  |
| Age group                  | 70-74 years   | 1               | 1               | 1                |
|                            | 75-79 years   | 1.07(0.99-1.15) | 1.11(1.01-1.23) | 1.08(1.052-1.15) |
|                            | 80-84 years   | 1.24(1.15-1.33) | 1.24(1.13-1.37) | 1.24(1.17-1.31)  |
|                            | ≥85 years     | 1.48(1.38-1.59) | 1.54(1.40-1.69) | 1.51(1.42-1.60)  |
| Charlson Comorbidity Index | One           | 1               | 1               | 1                |
|                            | Two           | 1.11(1.05-1.17) | 1.23(1.17-1.29) | 1.18(1.13-1.22)  |
|                            | Three or over | 1.35(1.27-1.42) | 1.62(1.54-1.70) | 1.49(1.43-1.54)  |
| Atrial fibrillation        |               | 1.15(1.09-1.20) | 1.21(1.16-1.26) | 1.18(1.15-1.22)  |
| Hypertension               |               | 0.83(0.80-0.87) | 0.87(0.84-0.90) | 0.85(0.83-0.87)  |
| Malnutrition               |               | 0.91(0.83-1.00) | 0.91(0.83-0.99) | 0.91(0.85-0.97)  |
| Pneumonia                  |               | 2.55(2.44-2.65) | 2.64(2.53-2.75) | 2.59(2.52-2.67)  |
| Urinary tract infection    |               | 0.85(0.81-0.90) | 0.79(0.75-0.83) | 0.82(0.79-0.85)  |
| LOHS (days)                |               | 0.98(0.97-0.99) | 0.98(0.97-0.99) | 0.98(0.97-0.99)  |
| Readmission                |               | 1.45(1.38-1.52) | 1.38(1.31-1.44) | 1.41(1.36-1.46)  |
| CAT                        |               | 0.69(0.66-0.73) | 0.67(0.64-0.71) | 0.68(0.66-0.71)  |
| Magnetic Resonance         |               | 0.37(0.31-0.45) | 0.25(0.20-0.32) | 0.32(0.27-0.37)  |
| PEG                        |               | 0.44(0.34-0.57) | 0.32(0.24-0.42) | 0.37(0.31-0.45)  |
| Parenteral nutrition       |               | 1.45(1.27-1.66) | 1.17(1.03-1.32) | 1.29(1.18-1.41)  |
| Mechanical ventilation     |               | 2.98(2.59-3.43) | 2.67(2.29-3.11) | 2.83(2.55-3.14)  |
| Type 2 Diabetes            |               | 0.99(0.95-1.04) | 1.01(0.97-1.05) | 1.00(0.98-1.03)  |
| Year                       |               | 0.97(0.96-0.98) | 0.97(0.96-0.98) | 0.97(0.96-0.98)  |

LOHS: length of hospital stay; CAT: Computed tomography angiography; PEG: Percutaneous Endoscopic Gastrostomy

The diabetic men and women who received mechanical ventilation had a higher probability of dying (2.98-fold and 2.67-fold, respectively) during their hospital stay than those who did not undergo this procedure. The use of PEG was associated with a reduced IHM among both diabetic men and women admitted for VaD (OR 0.44; 95% CI, 0.34-0.45 and OR 0.32; 95% CI, 0.24-0.42, respectively). In contrast, patients who received parenteral nutrition were more



1  
2  
3 likely to die during their stay (OR 1.45; 95% CI, 1.27-1.66 and OR 1.17; 95% CI, 1.03-1.32,  
4  
5 respectively).

6  
7 Time-trend analysis showed a significant decrease in IHM from 2004 to 2013 in diabetic men  
8  
9 and women (OR 0.97; 95% CI 0.96-0.98). When we analyzed the entire database, and after  
10  
11 adjusting for all covariates, suffering from diabetes was not associated with a higher IHM in  
12  
13 either men or women (OR 0.99; 95% CI, 0.95-1.04 and OR 1.01; 95% CI 0.97-1.05).

## 14 15 16 **DISCUSSION**

17  
18 In this study of more than 170,000 admissions for VaD, we found that the prevalence of  
19  
20 T2DM among men and women hospitalized has increased over time in all age groups.  
21  
22 This finding is not surprising because the prevalence of diabetes and dementia are both  
23  
24 rapidly increasing. [2,6]

25  
26 The association between diabetes and the risk of dementia has received much attention in  
27  
28 epidemiological studies. Ohara et al. reported an increase in the prevalence of all-cause  
29  
30 dementia in the Japanese population, [16] and diabetes was also identified as a significant  
31  
32 risk factor. Growing evidence in support of a biological relationship between diabetes and  
33  
34 VaD suggests a multifactorial pathogenesis that involves insulin metabolism, hyperglycemic  
35  
36 toxicity, chronic inflammation and vascular changes. [16,17] Diabetes is a known risk factor  
37  
38 for microvascular and macrovascular complications including stroke; [18] this suggests that  
39  
40 the relationship between diabetes and VaD is robust and not only driven by confounding. In  
41  
42 our study, age was the most strongly associated factor for VaD, and diabetic patients were  
43  
44 significantly younger than non-diabetic ones. Previous research has shown that patients with  
45  
46 both VaD and T2DM have a significantly earlier onset of VaD, a faster rate of cognitive  
47  
48 decline and a greater prevalence of neuropsychiatric symptoms than patients with VaD alone.  
49  
50 [19] In our study we found, as expected, a higher prevalence of hypertension among diabetic  
51  
52 patients compared to non-diabetics. It has been reported that arterial stiffness and small vessel  
53  
54  
55  
56  
57  
58  
59  
60

1  
2  
3 disease can predict future cognitive decline in elderly people with T2DM. [20]Over time, we  
4  
5 observed that people admitted to the hospital due to VaD were progressively older, with  
6  
7 increasing comorbid conditions and more hospital readmissions, which highlight the  
8  
9 increasing frailty of these patients. A link between comorbidity and the risk of dementia in  
10  
11 diabetic patients has also been published. [21]To further decrease the medical and social  
12  
13 economic burden associated with dementia, it seems necessary to focus on chronic disease  
14  
15 prevention.

16  
17  
18 Infections, diabetes or their complications have been highlighted as common reasons for  
19  
20 hospital admission in patients with dementia. [22] In our study, pneumonia and urinary tract  
21  
22 infections significantly increased over the study period. The use of bladder catheterization  
23  
24 has significantly increased over time, which can contribute to the higher observed prevalence  
25  
26 of urinary tract infections, but they are not associated with higher mortality. However,  
27  
28 pneumonia is one of the infectious complications that has significantly increased over the  
29  
30 study period and is also associated with a worse prognosis. The use of mechanical ventilation  
31  
32 has also significantly increased, and it is also associated with higher IHM. This finding is  
33  
34 relevant because it seems to be a bidirectional relationship: hospitalization with pneumonia  
35  
36 has been associated with dementia and persistent cognitive dysfunction with severe  
37  
38 infections. [23] On the other hand, dysphagia occurs frequently in patients with dementia and  
39  
40 is related to aspiration pneumonia. Interestingly, we have found lower mortality in patients  
41  
42 fed by PEG. This protective effect could be associated with a better nutritional and hydration  
43  
44 status and potentially lower rates of aspiration pneumonia, but this is only a hypothesis  
45  
46 because our study was not designed to evaluate the association between PEG and pneumonia.  
47  
48 Furthermore, there is controversial evidence on this issue. Finucane et al. found no data to  
49  
50 suggest that tube feeding of patients with advanced dementia prevented aspiration  
51  
52 pneumonia, prolonged survival or provided palliation, [24] while Nakajoh et al. showed that  
53  
54  
55  
56  
57  
58  
59  
60

1  
2  
3 the incidence of pneumonia was significantly higher in stroke patients with dysphagia who  
4  
5 were fed orally compared to those who received tube feeding (54.3 vs. 13.2%, $p<0.001$ ). [25]  
6

7  
8 As has been described previously for ischemic and hemorrhagic stroke, we have not found an  
9  
10 increased IHM due to VaD in patients with diabetes compared to those without. [18,26]  
11

12 Despite the fact that obesity is recognized as a major risk factor in the development of  
13  
14 cardiovascular diseases and diabetes, a higher BMI may be associated with a lower mortality  
15  
16 and a better outcome in several chronic diseases. [27-29] During the past decade, there has  
17  
18 been increasing evidence that patients, especially the elderly, with several chronic diseases  
19  
20 and elevated BMI may demonstrate lower all-cause and cardiovascular mortality compared  
21  
22 with patients of normal weight. [27] This observation has been referred to as “the obesity  
23  
24 paradox”. [28,29] The protective effect of nutritional status in overweight and obese elderly  
25  
26 individuals, and the health-deteriorating effects of undernutrition in non-overweight subjects,  
27  
28 probably contribute to this paradox. Although unfortunately in our study the BMI of patients  
29  
30 admitted for VaD was not registered, this could be a possible explanation. This hypothesis  
31  
32 concerning a better nutritional status is consistent with the better outcomes described above  
33  
34 in those patients undergoing PEG.  
35  
36  
37

38 The strength of our investigation lies in its large sample size, its 10-year follow-up period and  
39  
40 its standardized methodology. [30] Nevertheless, our study is subject to a series of  
41  
42 limitations. CMBD contains administrative discharge data for hospitalizations and uses  
43  
44 information that physician included in the discharge report. Therefore, we lack information  
45  
46 on relevant variables that may act as confounders, such as VaD or T2DM duration, treatments  
47  
48 for this last condition or sociodemographic characteristics, among others.  
49

50  
51 Another important limitation is the lack of specificity of clinically defined VaD. The  
52  
53 cognitive impairment observed in VaD and AD plus atherosclerosis might overlap  
54  
55 extensively. We are aware that considering other databases, such as mortality registries, in  
56  
57  
58  
59  
60

1  
2  
3 addition to discharge data would be advisable in order to detect patients with VaD dying  
4  
5 outside of a hospital, especially at nursing homes. Unfortunately, in Spain this process is still  
6  
7 unavailable for us.  
8

## 9 **CONCLUSIONS**

10 Our national data show that the incidence of VaD increased significantly during the period of  
11  
12 study. People with T2DM have more than double the risk of VaD after adjusting for other  
13  
14 risk factors. Patients admitted with VaD were progressively older and had multiple  
15  
16 comorbidities. Pneumonia was associated with poorer prognosis, and the use of PEG was  
17  
18 associated with reduced mortality. Diabetes was not associated with IHM, and the time-trends  
19  
20 show that mortality is decreasing over time.  
21  
22  
23  
24  
25  
26  
27  
28  
29  
30  
31  
32  
33  
34  
35  
36  
37  
38  
39  
40  
41  
42  
43  
44  
45  
46  
47  
48  
49  
50  
51  
52  
53  
54  
55  
56  
57  
58  
59  
60

## ACKNOWLEDGEMENTS

We wish to thank to Spanish Ministry of Health and Social Policy for providing the records of Minimum Basic Data Set (CMBD).

## CONTRIBUTIONS

NMR, RJG and ALdA researched data, contributed to the discussion, wrote the manuscript, and reviewed/edited the manuscript. VHB researched data and reviewed/edited the manuscript. NMR-MMB-JMdMY-JdMD-RJG-ALdA contributed to the discussion and reviewed/edited the manuscript.

All authors reviewed and gave their final approval of the version to be submitted.

## COMPETING INTERESTS

The authors declare that they have no competing interests.

## DATA SHARING STATEMENT

"No additional data available"

## FUNDING

This study was funded by the FIS (*Fondo de Investigaciones Sanitarias*—Health Research Fund, grants no. PI13/00118 & PI16/00564, *Instituto de Salud Carlos III*) co-financed by the European Union through the *Fondo Europeo de Desarrollo Regional* (FEDER, “*Una manera de hacer Europa*”), and by the *Grupo de Excelencia Investigadora URJC-Banco Santander* No. 30VCPIGI03: *Investigación traslacional en el proceso de salud—enfermedad* (ITPSE).

The funders had no role in study design, data collection and analysis, decision to publish, or preparation of the manuscript.

## REFERENCES

1. Prince M, Bryce R, Albanese E, Wimo A, Ribeiro W, Ferri CP. The global prevalence of dementia: a systematic review and metaanalysis. *Alzheimers Dement* 2013;9:63-75.
2. World Health Organization. Dementia. <http://www.who.int/mediacentre/factsheets/fs362/en/>. Accessed February 10, 2017.
3. Arvanitakis Z, Capuano AW, Leurgans SE, Bennett DA, Schneider JA. Relation of cerebral vessel disease to Alzheimer's disease dementia and cognitive function in elderly people: a cross-sectional study. *Lancet Neurol* 2016;15:934-43.
4. Verdelho A, Madureira S, Ferro JM, et al Differential impact of cerebral white matter changes, diabetes, hypertension and stroke on cognitive performance among non-disabled elderly. The LADIS study. *J Neurol Neurosurg Psychiatry* 2007;78:1325-1330.
5. Launer LJ. Diabetes and brain aging: epidemiologic evidence. *Curr Diab Rep* 2005;5:59–63.
6. World Health Organization. Global Report on diabetes. [http://apps.who.int/iris/bitstream/10665/204871/1/9789241565257\\_eng.pdf](http://apps.who.int/iris/bitstream/10665/204871/1/9789241565257_eng.pdf). Accessed February 10, 2017.
7. Sato N, Morishita R. Brain alterations and clinical symptoms of dementia in diabetes: A $\beta$ /tau dependent and independent mechanisms. *Frontiers in endocrinology* 2014;5:143:1-8.
8. Bordier L, Doucet J, Boudet J, Bauduceau B. Update on cognitive decline and dementia in elderly patients with diabetes. *Diabetes Metab* 2014;40:331-7.
9. Li W, Huang E. An Update on Type 2 Diabetes Mellitus as a Risk Factor for Dementia. *J Alzheimers Dis* 2016;53:393-402.
10. Lu FP, Lin KP, Kuo HK. Diabetes and the risk of multi-system aging phenotypes: a systematic review and meta-analysis. *Plos One* 2009;4(1):e4144.

- 1  
2  
3 11. Chatterjee S, Peters SA, Woodward M, et al. Type 2 Diabetes as a Risk Factor for  
4  
5 Dementia in Women compared With Men: A Pooled Analysis of 2.3 Million People  
6  
7 Comprising More than 100.000 Cases of Dementia. *Diabetes Care* 2016;39:300-307.  
8
- 9  
10 12. Fei M, Yan Ping Z, Ru Juan M, Ning Ning L, Lin G. Risk factors for dementia with type  
11  
12 2 diabetes mellitus among elderly people in China. *Age Ageing* 2013;42:398-400.  
13
- 14 13. Instituto Nacional de Gestión Sanitaria, Ministerio de Sanidad, Servicios Sociales e  
15  
16 Igualdad. Conjunto Mínimo Básico de Datos, Hospitales del INSALUD.  
17  
18 <http://www.ingesa.msc.es/estadEstudios/documPublica/CMBD-2001.htm>. Accessed February  
19  
20 10, 2017.  
21
- 22  
23 14. Charlson ME, Pompei P, Ales KL, MacKenzie CR. A new method of classifying  
24  
25 prognostic comorbidity in longitudinal studies: development and validation. *J Chronic Dis*  
26  
27 1987;40:373–383.  
28
- 29  
30 15. Ohara T. Epidemiology of Diabetes and risk of Dementia. *Brain Nerve* 2016;68:719-27.  
31
- 32  
33 16. Ninomiya T. Diabetes mellitus and dementia. *Curr Diab Rep* 2014;14:487.  
34
- 35  
36 17. Ahtiluoto S, Polvikoski T, Peltonen M, et al. Diabetes, Alzheimer disease, and vascular  
37  
38 dementia: a population-based neuropathologic study. *Neurology* 2010;75:1195-1202.  
39
- 40  
41 18. Muñoz-Rivas N, Méndez-Bailón M, Hernández-Barrera V, et al. Time Trends in  
42  
43 Ischemic Stroke among Type 2 Diabetic and Non-Diabetic Patients: Analysis of the Spanish  
44  
45 National Hospital Discharge Data (2003-2012). *PLoS ONE* 2015;10: e0145535.  
46
- 47  
48 19. Murthy SB, Jawaid A, Qureshi SU, et al. Does diabetes mellitus alter the onset and  
49  
50 clinical course of vascular dementia. *Behav Neurol* 2010;23:145-51.  
51
- 52  
53 20. Brundel M, van den Heuvel M, de Bresser J, Kappelle LJ, Biessels GJ; Utrecht Diabetic  
54  
55 Encephalopathy Study Group. Cerebral cortical thickness in patients with type 2 diabetes. *J*  
56  
57 *Neurol Sci* 2010;299:126-30.  
58  
59  
60

- 1  
2  
3 21. Kuo SC, Lai SW, Hung HC, et al. Association between comorbidities and dementia in  
4 diabetes mellitus patients: population-based retrospective cohort study. *J Diabetes*  
5 *Complications* 2015;29(8):1071-6.  
6  
7  
8  
9  
10 22. Chang CC, Lin PH, Chang YT, et al. The impact of admission diagnosis on recurrent or  
11 frequent hospitalizations in 3 dementia subtypes: A hospital-based cohort in Taiwan with 4  
12 years longitudinal follow-ups. *Medicine (Baltimore)* 2015;94:e2091.  
13  
14  
15  
16 23. Tate AJ, Snitz BE, Alvarez KA, et al. Infection hospitalization increases risk of dementia  
17 in the elderly. *Crit Care Med* 2014;25:1037-1046.  
18  
19  
20  
21 24. Finucane, TE, Christmas, C, Travis, K. Tube feeding in patients with advanced dementia:  
22 a review of the evidence. *JAMA* 1999;282:1365-1370.  
23  
24  
25 25. Nakajoh, K, Nakagawa, T, Sekizawa, K, Matsui T, Arai H, Sasaki H. Relation between  
26 incidence of pneumonia and protective reflexes in post-stroke patients with oral or tube  
27 feeding. *J Intern Med* 2000;247:39-42.  
28  
29  
30  
31  
32 26. Muñoz-Rivas N, Méndez-Bailón M, Hernández-Barrera V, et al. Type 2 diabetes and  
33 hemorrhagic stroke: A population –based study in Spain from 2003-2012. *J Stroke*  
34 *Cerebrovasc Dis* 2016;25:1289-1560.  
35  
36  
37  
38 27. Hainer V, Aldhoon-Hainerová I. Obesity Paradox Does Exist. *Diabetes Care*  
39 2013;36:S276-S281.  
40  
41  
42  
43 28. Kalantar-Zadeh K, Block G, Horwich T, Fonaro GC. Reverse epidemiology of  
44 conventional cardiovascular risk factors in patients with chronic heart failure. *J Am Coll*  
45 *Cardiol* 2004;43:1439–1444.  
46  
47  
48  
49 29. Gruberg L, Weissman NJ, Waksman R, et al. The impact of obesity on the short-term and  
50 long-term outcomes after percutaneous coronary intervention: the obesity paradox?. *J Am*  
51 *Coll Cardiol* 2002;39:578–584.  
52  
53  
54  
55  
56  
57  
58  
59  
60



1  
2  
3 30. Lopez-de-Andres A, Jimenez-García R, Hernandez-Barrera V, et al. National trends in  
4 utilization and outcomes of coronary revascularization procedures among people with and  
5 without type 2 diabetes in Spain (2001-2011). *Cardiovasc Diabetol* 2014;13:3.  
6  
7  
8  
9  
10  
11  
12  
13  
14  
15  
16  
17  
18  
19  
20  
21  
22  
23  
24  
25  
26  
27  
28  
29  
30  
31  
32  
33  
34  
35  
36  
37  
38  
39  
40  
41  
42  
43  
44  
45  
46  
47  
48  
49  
50  
51  
52  
53  
54  
55  
56  
57  
58  
59  
60

For peer review only

## SUPPLEMENTARY METHODS

We calculated the adjusted incidence of discharge rates after vascular dementia (VaD) for men and women with and without type 2 diabetes (T2DM) per 100,000 inhabitants.

We calculated yearly diabetes-specific incidence rates dividing the number of cases per year, sex, and age group by the corresponding number of people in that population group, using age- and sex-adjusted estimated prevalence of diabetes obtained from National Health Surveys (NHS) conducted in 2003/4, 2006/7, 2009/10 and 2011/12 and data from Di@bet.es Study. [1,2] From 2001 till 2010, Spanish NHS has been published every two or three years. So diabetic population for the missing years was estimated assuming that growth rate was the same thorough the period 2004-2013. We estimated rate fitting a linear regression model with population from years when NHS was available and we used this model to impute population for 2005, 2008 and 2013. We also calculated the yearly age- and sex-specific incidence rates for non-diabetic patients dividing the number of cases per year, sex, and age group by the corresponding number of people in that population group (excluding those with T2DM), according to data from the Spanish National Institute of Statistics, as reported on December 31 of each year. [3] All incidences were adjusted to the year 2013 population.

Clinical characteristics included information on overall comorbidity at the time of diagnosis, which was assessed by calculating the Charlson Comorbidity Index (CCI). [4] The index applies to 17 disease categories, the scores of which are added to obtain an overall score for each patient. We divided patients into three categories: low index, which corresponds to patients with no previously recorded disease or with one disease category; medium index, patients with two categories; and high index, patients with three or more disease categories.

1  
2  
3 To calculate the CCI we used 15 disease categories, excluding diabetes and dementia as  
4 described by Thomsen et al. [5]  
5  
6

### 7 **Statistical analysis**

8  
9 A descriptive statistical analysis was performed for all continuous variables and  
10 categories by stratifying discharges for vascular dementia according to diabetes status  
11 and sex. Variables are shown as proportions, means with standard deviations or medians  
12 with interquartile ranges (LOHS). Bivariate analyses of variables according to year was  
13 using  $\chi^2$  linear trend analysis (proportions), ANOVA (means) and Kruskal-Wallis test  
14 (medians), as appropriate. To assess differences between those men and women with  
15 and without T2DM, for each year and for the total sample, the statistical tests conducted  
16 for continuous variables were the T test for normal distributions and the Mann-Whitney  
17 test for non-normal distributions and categorical variables were compared using the  
18 Chi-square test.  
19  
20  
21  
22  
23  
24  
25  
26  
27  
28  
29  
30

31 In order to test the time trend in the incidence due to VaD, we fitted separate Poisson  
32 regression models for men and women with and without T2DM, using year of  
33 discharge, age, CCI, hypertension, atrial fibrillation, infectious complications,  
34 malnutrition, agitation, diagnostic and therapeutic procedures and readmission as  
35 independent variables. So that estimates correspond to Incidence Rate Ratio (IRR) with  
36 their 95% confidence intervals. The inclusion of year of discharge allow us to estimate  
37 the average yearly rate of change.  
38  
39  
40  
41  
42  
43  
44  
45  
46

47 For IHM, logistic regression analyses were performed for men and women with  
48 mortality as a binary outcome for those with and without diabetes and for the entire  
49 population to assess the influence of diabetes on IHM. The independent variables  
50 included in the model were those that showed a significant association in the bivariate  
51 analysis or considered relevant in the medical literature.  
52  
53  
54  
55  
56  
57  
58  
59  
60

1  
2  
3 Statistical analyses were performed using Stata version 10.1 (Stata, College Station,  
4 Texas, USA). Statistical significance was set at  $p < 0.05$  (2-tailed).  
5  
6

### 7 **Ethics**

8  
9 Data confidentiality was maintained at all times in accordance with Spanish legislation.  
10  
11 Patient identifiers were deleted before the database was provided to the authors in order  
12  
13 to maintain patient anonymity. It is not possible to identify patients on individual levels,  
14  
15 either in this article or in the database. Given the anonymous and mandatory nature of  
16  
17 the dataset, it was not necessary to obtain informed consent. The study protocol was  
18  
19 approved by the ethics committee of the Universidad Rey Juan Carlos.  
20  
21  
22  
23  
24  
25  
26  
27  
28  
29  
30  
31  
32  
33  
34  
35  
36  
37  
38  
39  
40  
41  
42  
43  
44  
45  
46  
47  
48  
49  
50  
51  
52  
53  
54  
55  
56  
57  
58  
59  
60

**REFERENCES**

1. Soriguer F, Goday A, Bosch-Comas A, et al. Prevalence of diabetes mellitus and impaired glucose regulation in Spain: the Di@bet.es Study. *Diabetologia* 2012; 55:88-93.
2. Ministerio de Sanidad, Servicios Sociales e Igualdad. Encuesta Nacional de Salud de España. <http://www.msssi.gob.es/estadEstudios/estadisticas/encuestaNacional/>. Accessed February 10, 2017.
3. Instituto Nacional de Estadística. Population estimates 2010. <http://www.ine.es>. Accessed February 10, 2017.
4. Charlson ME, Pompei P, Ales KL, MacKenzie CR. A new method of classifying prognostic comorbidity in longitudinal studies: development and validation. *J Chronic Dis* 1987;40:373–383.
5. Thomsen RW, Nielsen JS, Ulrichsen SP, Pedersen L, Hansen AM, Nilsson T. The Danish Centre for Strategic Research in Type 2 Diabetes (DD2) study: Collection of baseline data from the first 580 patients. *Clin Epidemiol* 2012; 4:43-48.

**Supplementary Table. Incidence of hospitalizations with vascular dementia among people with and without type 2 diabetes according to sex and age groups. Analysis of the Spanish National Hospital Discharge Database from 2004 to 2013.**

| Rate*<br>100.000/Inh | Diabetes | Age<br>group | 2004    | 2005    | 2006    | 2007    | 2008    | 2009    | 2010    | 2011    | 2012    | 2013    | Total   | p-value |
|----------------------|----------|--------------|---------|---------|---------|---------|---------|---------|---------|---------|---------|---------|---------|---------|
| Men                  | No       | 70-74        | 94.44   | 89.32   | 81.36   | 84.92   | 95.68   | 82.91   | 83.57   | 68.93   | 79.45   | 74.1    | 83.66   | <0.001  |
|                      |          | 75-79        | 210.88  | 211.6   | 198.33  | 191.4   | 208.25  | 202.8   | 201.93  | 247.69  | 216.9   | 260.87  | 213.09  | <0.001  |
|                      |          | 80-84        | 436.5   | 423.05  | 390.5   | 389.72  | 413.81  | 429.29  | 485.58  | 437.61  | 430.23  | 392.87  | 421.69  | 0.372   |
|                      |          | ≥85          | 652.21  | 689.83  | 753.13  | 862.05  | 789.82  | 834.04  | 895.58  | 866.84  | 903.98  | 886.14  | 824.15  | <0.001  |
|                      | Yes      | 70-74        | 220.31  | 245.77  | 266.13  | 243.04  | 247.71  | 252.27  | 222.66  | 237.99  | 240.44  | 223.93  | 240.19  | 0.341   |
|                      |          | 75-79        | 437.4   | 496.19  | 538.43  | 592.83  | 527.72  | 482.81  | 463.28  | 434.65  | 471.01  | 407.09  | 479.19  | <0.001  |
|                      |          | 80-84        | 684.81  | 788.86  | 901.56  | 828.49  | 945.7   | 1000.27 | 1121.94 | 864.39  | 964.72  | 773.21  | 887.28  | 0.001   |
|                      |          | ≥85          | 1191.79 | 1032.39 | 954.29  | 1182.21 | 1218.95 | 1239.99 | 1483.13 | 1473.93 | 1594.54 | 1393.17 | 1308.71 | <0.001  |
|                      | Both     | 70-74        | 118.32  | 119.00  | 116.41  | 114.92  | 126.4   | 119.45  | 113.57  | 104.22  | 113.05  | 104.32  | 115.09  | 0.001   |
|                      |          | 75-79        | 255.79  | 264.71  | 258.39  | 262.29  | 271.96  | 264.86  | 259.85  | 297.95  | 285.21  | 308.52  | 272.4   | <0.001  |
|                      |          | 80-84        | 485.99  | 490.81  | 479.62  | 466.23  | 510.86  | 538.25  | 607.01  | 525.27  | 540.02  | 475.06  | 511.78  | <0.001  |
|                      |          | ≥85          | 720.61  | 745.45  | 792.37  | 924.5   | 868.51  | 904.76  | 997.94  | 980.44  | 1033.2  | 986.38  | 911.42  | <0.001  |
| Women                | No       | 70-74        | 37.79   | 34.39   | 36.32   | 32.45   | 33.88   | 33.13   | 32.38   | 28.49   | 31.86   | 28.86   | 33.12   | <0.001  |
|                      |          | 75-79        | 109.37  | 115.35  | 99.22   | 98.06   | 112.88  | 100.08  | 108.01  | 108.95  | 100.4   | 100.98  | 105.16  | 0.118   |
|                      |          | 80-84        | 301.13  | 309.31  | 283.44  | 298.72  | 313.54  | 293.75  | 302.52  | 298.33  | 323.16  | 291.05  | 301.48  | 0.593   |
|                      |          | ≥85          | 606.23  | 744.35  | 774.9   | 856.96  | 799.7   | 716.21  | 774.61  | 805.93  | 842.19  | 808.91  | 776.52  | <0.001  |
|                      | Yes      | 70-74        | 125.2   | 148.93  | 174.96  | 172.02  | 157.77  | 162.02  | 131.58  | 107.16  | 112.02  | 81.61   | 133.06  | <0.001  |
|                      |          | 75-79        | 277.62  | 303.68  | 327.3   | 300.46  | 315.38  | 309.76  | 321.37  | 327.01  | 308.12  | 274.08  | 306.61  | 0.894   |
|                      |          | 80-84        | 877.79  | 782.59  | 759.27  | 774.24  | 699.39  | 723.21  | 743.62  | 719.43  | 732.64  | 689.29  | 741.21  | <0.001  |
|                      |          | ≥85          | 1040.53 | 1219.07 | 1441.66 | 1588.68 | 1556.53 | 1483.56 | 1505.36 | 1353.57 | 1369.1  | 1211.87 | 1369.63 | 0.660   |
|                      | Both     | 70-74        | 54.69   | 54.57   | 58.26   | 54.53   | 55.15   | 57.15   | 50.87   | 46.35   | 50.05   | 42.92   | 52.55   | <0.001  |
|                      |          | 75-79        | 148.33  | 155.72  | 144.78  | 138.49  | 155     | 145.38  | 154.11  | 156.25  | 145.46  | 138.68  | 148.16  | 0.375   |
|                      |          | 80-84        | 393.36  | 390.19  | 369.13  | 384.36  | 389.4   | 384.61  | 395.84  | 389.45  | 411.76  | 378.94  | 388.82  | 0.246   |
|                      |          | ≥85          | 683.25  | 831.01  | 900.4   | 994.69  | 936.14  | 850.43  | 902.43  | 916.84  | 948.9   | 899.74  | 890.19  | <0.001  |

*Adjusted incidence per 100,000 inhabitants. P value for time trend using Poisson regression*

STROBE 2007 (v4) Statement—Checklist of items that should be included in reports of *cross-sectional studies*

| Section/Topic                | Item # | Recommendation                                                                                                                                                                       | Reported on page #    |
|------------------------------|--------|--------------------------------------------------------------------------------------------------------------------------------------------------------------------------------------|-----------------------|
| Title and abstract           | 1      | (a) Indicate the study's design with a commonly used term in the title or the abstract                                                                                               | 1,2,3                 |
|                              |        | (b) Provide in the abstract an informative and balanced summary of what was done and what was found                                                                                  | 2,3                   |
| <b>Introduction</b>          |        |                                                                                                                                                                                      |                       |
| Background/rationale         | 2      | Explain the scientific background and rationale for the investigation being reported                                                                                                 | 4                     |
| Objectives                   | 3      | State specific objectives, including any prespecified hypotheses                                                                                                                     | 4                     |
| <b>Methods</b>               |        |                                                                                                                                                                                      |                       |
| Study design                 | 4      | Present key elements of study design early in the paper                                                                                                                              | 4,5                   |
| Setting                      | 5      | Describe the setting, locations, and relevant dates, including periods of recruitment, exposure, follow-up, and data collection                                                      | 4,5                   |
| Participants                 | 6      | (a) Give the eligibility criteria, and the sources and methods of selection of participants                                                                                          | 4,5                   |
| Variables                    | 7      | Clearly define all outcomes, exposures, predictors, potential confounders, and effect modifiers. Give diagnostic criteria, if applicable                                             | 4,5                   |
| Data sources/<br>measurement | 8*     | For each variable of interest, give sources of data and details of methods of assessment (measurement). Describe comparability of assessment methods if there is more than one group | 4,5                   |
| Bias                         | 9      | Describe any efforts to address potential sources of bias                                                                                                                            | Supplementary methods |
| Study size                   | 10     | Explain how the study size was arrived at                                                                                                                                            | 4,5                   |
| Quantitative variables       | 11     | Explain how quantitative variables were handled in the analyses. If applicable, describe which groupings were chosen and why                                                         | Supplementary methods |
| Statistical methods          | 12     | (a) Describe all statistical methods, including those used to control for confounding                                                                                                | Supplementary methods |
|                              |        | (b) Describe any methods used to examine subgroups and interactions                                                                                                                  | Supplementary methods |
|                              |        | (c) Explain how missing data were addressed                                                                                                                                          | Supplementary         |

1  
2  
3  
4  
5  
6  
7  
8  
9  
10  
11  
12  
13  
14  
15  
16  
17  
18  
19  
20  
21  
22  
23  
24  
25  
26  
27  
28  
29  
30  
31  
32  
33  
34  
35  
36  
37  
38  
39  
40  
41  
42  
43  
44  
45  
46  
47  
48  
49

|                          |     |                                                                                                                                                                                                                                                                                                                                                                                                               |         |
|--------------------------|-----|---------------------------------------------------------------------------------------------------------------------------------------------------------------------------------------------------------------------------------------------------------------------------------------------------------------------------------------------------------------------------------------------------------------|---------|
|                          |     |                                                                                                                                                                                                                                                                                                                                                                                                               | methods |
|                          |     | (d) If applicable, describe analytical methods taking account of sampling strategy                                                                                                                                                                                                                                                                                                                            |         |
|                          |     | (e) Describe any sensitivity analyses                                                                                                                                                                                                                                                                                                                                                                         |         |
| <b>Results</b>           |     |                                                                                                                                                                                                                                                                                                                                                                                                               |         |
| Participants             | 13* | (a) Report numbers of individuals at each stage of study—eg numbers potentially eligible, examined for eligibility, confirmed eligible, included in the study, completing follow-up, and analysed<br>(b) Give reasons for non-participation at each stage<br>(c) Consider use of a flow diagram                                                                                                               | 5-16    |
| Descriptive data         | 14* | (a) Give characteristics of study participants (eg demographic, clinical, social) and information on exposures and potential confounders<br>(b) Indicate number of participants with missing data for each variable of interest                                                                                                                                                                               | 5-16    |
| Outcome data             | 15* | Report numbers of outcome events or summary measures                                                                                                                                                                                                                                                                                                                                                          | 5-16    |
| Main results             | 16  | (a) Give unadjusted estimates and, if applicable, confounder-adjusted estimates and their precision (eg, 95% confidence interval). Make clear which confounders were adjusted for and why they were included<br>(b) Report category boundaries when continuous variables were categorized<br>(c) If relevant, consider translating estimates of relative risk into absolute risk for a meaningful time period | 5-16    |
| Other analyses           | 17  | Report other analyses done—eg analyses of subgroups and interactions, and sensitivity analyses                                                                                                                                                                                                                                                                                                                |         |
| <b>Discussion</b>        |     |                                                                                                                                                                                                                                                                                                                                                                                                               |         |
| Key results              | 18  | Summarise key results with reference to study objectives                                                                                                                                                                                                                                                                                                                                                      | 16-18   |
| Limitations              | 19  | Discuss limitations of the study, taking into account sources of potential bias or imprecision. Discuss both direction and magnitude of any potential bias                                                                                                                                                                                                                                                    | 16-18   |
| Interpretation           | 20  | Give a cautious overall interpretation of results considering objectives, limitations, multiplicity of analyses, results from similar studies, and other relevant evidence                                                                                                                                                                                                                                    | 16-18   |
| Generalisability         | 21  | Discuss the generalisability (external validity) of the study results                                                                                                                                                                                                                                                                                                                                         | 19      |
| <b>Other information</b> |     |                                                                                                                                                                                                                                                                                                                                                                                                               |         |
| Funding                  | 22  | Give the source of funding and the role of the funders for the present study and, if applicable, for the original study on which the present article is based                                                                                                                                                                                                                                                 | 20      |

\*Give information separately for cases and controls in case-control studies and, if applicable, for exposed and unexposed groups in cohort and cross-sectional studies.



1  
2  
3  
4 **Note:** An Explanation and Elaboration article discusses each checklist item and gives methodological background and published examples of transparent reporting. The STROBE  
5 checklist is best used in conjunction with this article (freely available on the Web sites of PLoS Medicine at <http://www.plosmedicine.org/>, Annals of Internal Medicine at  
6 <http://www.annals.org/>, and Epidemiology at <http://www.epidem.com/>). Information on the STROBE Initiative is available at [www.strobe-statement.org](http://www.strobe-statement.org).  
7  
8  
9  
10  
11  
12  
13  
14  
15  
16  
17  
18  
19  
20  
21  
22  
23  
24  
25  
26  
27  
28  
29  
30  
31  
32  
33  
34  
35  
36  
37  
38  
39  
40  
41  
42  
43  
44  
45  
46  
47  
48  
49

For peer review only

# BMJ Open

## Observational study of vascular dementia in the Spanish elderly population according to type 2 diabetes status: trends in incidence, characteristics and outcomes (2004-2013)

|                                 |                                                                                                                                                                                                                                                                                                                                                                                                                                                                                                                                                                                                                                                                                     |
|---------------------------------|-------------------------------------------------------------------------------------------------------------------------------------------------------------------------------------------------------------------------------------------------------------------------------------------------------------------------------------------------------------------------------------------------------------------------------------------------------------------------------------------------------------------------------------------------------------------------------------------------------------------------------------------------------------------------------------|
| Journal:                        | <i>BMJ Open</i>                                                                                                                                                                                                                                                                                                                                                                                                                                                                                                                                                                                                                                                                     |
| Manuscript ID                   | bmjopen-2017-016390.R1                                                                                                                                                                                                                                                                                                                                                                                                                                                                                                                                                                                                                                                              |
| Article Type:                   | Research                                                                                                                                                                                                                                                                                                                                                                                                                                                                                                                                                                                                                                                                            |
| Date Submitted by the Author:   | 22-Mar-2017                                                                                                                                                                                                                                                                                                                                                                                                                                                                                                                                                                                                                                                                         |
| Complete List of Authors:       | Muñoz-Rivas, Nuria; Hospital Universitario Infanta Leonor, Internal Medicine Department<br>Mendez-Bailon, Manuel; Hospital Clinico Universitario San Carlos, Internal Medicine Department<br>de Miguel-Yanes, Jose; Hospital General Universitario Gregorio Marañon, Internal Medicine Department<br>Hernandez-Barrera, Valentin; Universidad Rey Juan Carlos, Preventive Medicine and Public Health Teaching and Research Unit<br>de Miguel-Diez, Javier; Hospital General Universitario Gregorio Marañón, Jimenez-Garcia, Rodrigo; Univ Rey Juan Carlos,<br>Lopez-de-Andres, Ana ; Universidad Rey Juan Carlos, Preventive Medicine and Public Health Teaching and Research Unit. |
| <b>Primary Subject Heading</b>: | Epidemiology                                                                                                                                                                                                                                                                                                                                                                                                                                                                                                                                                                                                                                                                        |
| Secondary Subject Heading:      | Diabetes and endocrinology                                                                                                                                                                                                                                                                                                                                                                                                                                                                                                                                                                                                                                                          |
| Keywords:                       | Type 2 diabetes, Vascular dementia, Hospitalization, In-hospital mortality                                                                                                                                                                                                                                                                                                                                                                                                                                                                                                                                                                                                          |
|                                 |                                                                                                                                                                                                                                                                                                                                                                                                                                                                                                                                                                                                                                                                                     |

SCHOLARONE™  
Manuscripts

1  
2  
3 1 **Observational study of vascular dementia in the Spanish elderly population according to**  
4  
5 2 **type 2 diabetes status: trends in incidence, characteristics and outcomes (2004-2013)**  
6  
7 3

8  
9 4 Nuria Muñoz-Rivas<sup>1</sup>, Manuel Méndez-Bailón<sup>2</sup>, José M de Miguel-Yanes<sup>3</sup>, Valentín  
10  
11 5 Hernández-Barrera<sup>4</sup>, Javier de Miguel-Díez<sup>5</sup>, Rodrigo Jiménez-García<sup>4¶</sup>, Ana López-de-  
12  
13 6 Andrés<sup>4¶</sup>

14  
15  
16 7 <sup>1</sup>Internal Medicine Department. Hospital Universitario Infanta Leonor. Madrid. Spain.

17  
18 8 <sup>2</sup>Internal Medicine Department. Hospital Universitario Clínico San Carlos. Madrid. Spain.

19  
20 9 <sup>3</sup>Internal Medicine Department. Hospital General Universitario Gregorio Marañón. Madrid.  
21  
22 10 Spain

23  
24 11 <sup>4</sup>Preventive Medicine and Public Health Teaching and Research Unit. Health Sciences  
25  
26 12 Faculty. Rey Juan Carlos University. Madrid. Spain.

27  
28 13 <sup>5</sup>Respiratory Care Department, Hospital General Universitario Gregorio Marañón. Madrid.  
29  
30 14 Spain.

31  
32 15 ¶These authors contributed equally to this work.  
33

34  
35  
36 16  
37  
38 17 Address for correspondence:Rodrigo Jiménez-García. Preventive Medicine and Public Health  
39  
40 18 Teaching and Research Unit, Health Sciences Faculty, Rey Juan Carlos University Avda. de  
41  
42 19 Atenas s/n, 28922 Alcorcón, Madrid, Spain. Tel: +34 91 4888853. Fax: +34 91 4888848. E-  
43  
44 20 mail: [rodrigo.jimenez@urjc.es](mailto:rodrigo.jimenez@urjc.es)  
45  
46  
47 21

48  
49 22 **Key Words:** Type 2 diabetes; Vascular dementia; Hospitalization; In-hospital mortality  
50  
51 23

52  
53  
54 24 **Word count:** 3,536  
55  
56  
57  
58  
59  
60

1  
2  
3 **1 ABSTRACT**

4  
5 **2 Objectives:** To examine trends in the incidence and outcomes of vascular dementia (VaD)  
6  
7 hospitalizations in elderly patients with and without type 2 diabetes (T2DM) in Spain, 2004-  
8  
9 2013.

10  
11 **5 Design:** Retrospective study.

12  
13 **6 Setting:** Spain.

14  
15 **7 Participants:** We used national hospital discharge data to select all patients aged  $\geq 70$   
16  
17 discharged from a hospital with VaD as a primary diagnosis.

18  
19 **9 Main outcome measures:** Overall incidence, diagnostic and therapeutic procedures, patient  
20  
21 comorbidities, infectious complications, length of hospital stays and in-hospital mortality  
22  
23 (IHM).  
24

25  
26 **12 Results:** We identified a total of 170,607 admissions for VaD (34.3% with T2DM). We found  
27  
28 a significant upward linear trend in the incidence of VaD for men and women with and  
29  
30 without diabetes from 2004 to 2013. The adjusted incidence was higher among people with  
31  
32 T2DM over the study period. We found a higher incidence in men than women in all years  
33  
34 studied. T2DM was positively associated with VaD hospitalization among men (IRR 2.14,  
35  
36 95%CI 2.11-2.16) and for women (IRR 2.22; 95% CI 2.19-2.25).  
37  
38

39  
40 Pneumonia was significantly associated with a higher mortality (OR 2.59, 95%CI 2.52 -2.67).  
41  
42 We found that percutaneous endoscopic gastrostomy was associated with lower IHM (OR  
43  
44 0.37, 95%CI 0.31-0.45), while parenteral nutrition had the opposite effect (OR 1.29, 95%CI  
45  
46 1.18-1.41). Diabetes was not associated with higher IHM (OR 0.99, 95%CI 0.93–1.06). For  
47  
48 the entire sample, time-trend analyses showed a significant decrease in mortality in patients  
49  
50 admitted for VaD (OR 0.98, 95%CI 0.97–0.99).  
51  
52

53  
54 **24 Conclusions:** Incidence rates for VaD hospitalizations were twice as high in diabetic patients  
55  
56 compared to non-diabetics. Men had significantly higher incidence rates than women,  
57  
58

1  
2  
3 1 regardless of diabetes status. In both groups studied, pneumonia and parenteral nutrition were  
4  
5 2 associated with mortality while percutaneous endoscopic gastrostomy was associated with  
6  
7 3 survival. The presence of diabetes was not associated with higher IHM during hospitalization  
8  
9 4 with VaD.  
10  
11  
12 5

#### 14 **Strengths and limitations of this study**

15  
16  
17  
18  
19  
20  
21  
22  
23  
24  
25  
26  
27  
28  
29  
30  
31  
32  
33  
34  
35  
36  
37  
38  
39  
40  
41  
42  
43  
44  
45  
46  
47  
48  
49  
50  
51  
52  
53  
54  
55  
56  
57  
58  
59  
60

- 8 • The strength of our investigation lies in its large sample size, the 10-year follow-up  
9 period, and the standardized methodology.
- 10 • A limitation is the lack of information on VaD or T2DM duration, treatments for this  
11 last condition or sociodemographic characteristic.
- 12 • Another limitation is the lack of specificity of clinically defined VaD.

## 1 INTRODUCTION

2 Dementia has become a significant global economic, social, and public health burden. [1,2]

3 The most common types of dementia are vascular dementia (VaD) and Alzheimer's disease  
4 (AD), which together account for more than 90% of all cases. [1]

5 Several epidemiological studies have also demonstrated that diabetic patients are at an  
6 increased risk for stroke, lacunar infarcts, AD and VaD [3-5] through A $\beta$ /tau-dependent and  
7 independent mechanisms. [3]

8 Type 2 diabetes mellitus (T2DM), which affects more than 300 million people worldwide, [6]  
9 increases the risk of macrovascular and microvascular complications, and it is also an  
10 independent risk factor for vascular dementia [7,8] and AD. [9] It has recently been published  
11 that diabetic patients have a 60% greater risk for the development of dementia. [10] Factors  
12 reportedly linked with dementia include age, smoking, hypertension and diabetes, therefore it  
13 is only to be expected that hospitalization for VaD will increase in the coming years. [11,12]  
14 For this reason, it seems necessary to analyze the evolution of VaD over time and to evaluate  
15 which factors and procedures may increase in-hospital mortality (IHM).

16 In this study, we used national hospital discharge data to examine linear trends in the  
17 incidence of VaD among hospitalized men and women with and without T2DM between  
18 2004 and 2013 in Spain. In particular, we analyzed linear trends in the use of diagnostic and  
19 therapeutic procedures, patient comorbidities, common infectious and medical complications  
20 and in-hospital outcomes such as length of hospital stay (LOHS), readmission rates and IHM.

## 21 METHODS

22 This retrospective, observational study was conducted using the Spanish National Hospital  
23 Database (CMBD, *Conjunto Minimo Básico de Datos*). [13] We selected all patients aged  $\geq 70$   
24 years hospitalized for VaD (ICD-9-CM codes: 290.40, 290.41, 290.42, 290.43) as the primary  
25 diagnosis between January 1, 2004 and December 31, 2013.

1 Discharges were grouped by diabetes status as follows: T2DM (codes: 250.x0; 250.x2) and no  
2 diabetes.

3 We calculated the adjusted incidence of discharge rates after VaD for men and women with  
4 and without T2DM per 100,000 inhabitants, as described in detail in the Supplementary  
5 Methods.

6 Clinical characteristics included information on overall comorbidity at the time of diagnosis,  
7 which was assessed by calculating the Charlson Comorbidity Index (CCI) [14] as described in  
8 detail in the Supplementary Methods.

9 We specifically analyzed the presence of previous stroke (ICD 9MD codes 430.x, 431.x,  
10 433.x1, 434.x1, 435.x, 436, and 362.3), hypertension (codes: 401, 401.0, 401.1, 401.9) and  
11 atrial fibrillation (code: 427.31) in any diagnosis position during vascular dementia  
12 hospitalization. We also identified common infectious complications such as pneumonia  
13 (codes: 480-488, 507.0-507.8) and urinary tract infection (codes: 590.0, 590.9, 595.0, 595.9,  
14 597.80, 599.0). We analyzed other medical complications, specifically agitation (code: 307.9)  
15 and malnutrition (code: 263.9).

16 We identified the following diagnostic and therapeutic procedures: magnetic resonance (code:  
17 88.91), computed tomography angiography (CAT) (code: 87.03), percutaneous endoscopic  
18 gastrostomy (PEG) (code: 43.11), mechanical ventilation (codes: 96.7; 96.70; 96.71; 96.72),  
19 parenteral nutrition (codes: 99.15) and bladder catheterization (code: 57.94).

20 Patient readmissions were defined as inpatient re-hospitalization within 30 days of discharge  
21 (30-day readmission). The mean LOHS and the proportion of patients who died during the  
22 hospital admission, IHM, were also estimated for each year studied.

23 Statistical analysis is described in the Supplementary Methods.

## 24 **ETHICS**

25 Data confidentiality was maintained at all times in accordance with Spanish legislation.

1 Patient identifiers were deleted before the database was provided to the authors in order to  
2 maintain patient anonymity. It is not possible to identify patients on individual levels, either in  
3 this article or in the database. Given the anonymous and mandatory nature of the dataset, it  
4 was not necessary to obtain informed consent according to the Spanish legislation. The study  
5 protocol was approved by the ethics committee of the Universidad Rey Juan Carlos.

## 7 **RESULTS**

8 We identified a total of 170,607 discharges of patients (78,499 men and 92,108 women)  
9 admitted with VaD as the primary diagnosis. Patients with T2DM accounted for 34.3% of the  
10 total. The prevalence of T2DM in men with VaD increased significantly during the study  
11 period, from 28.94% in 2004 to 34.58% in 2013 ( $p<0.01$ ). The prevalence of diabetes in  
12 women with VaD increased from 34.13% to 35.37% ( $p<0.01$ ).

13 The overall adjusted incidence of admissions for VaD was higher among the oldest subgroup  
14 ( $\geq 85$  years), both in men and women, diabetic and non-diabetic. In T2DM patients older than  
15 85 years, we found that incidence rates were 1,369.63 per 100,000 inhabitants in women and  
16 1,308.71 per 100,000 inhabitants in men. In the non-diabetic group, incidence rates for men  
17 and women were 776.52 and 824.15 per 100,000 inhabitants, respectively (Supplementary  
18 Table).

19 The adjusted incidence rate of admissions for VaD increased significantly in men with T2DM  
20 aged  $\geq 85$  years old (1,191.79 cases per 100,000 inhabitants in 2004 to 1,393.17 cases in  
21 2013). However, there were no significant changes in the incidence of diagnosis of VaD in  
22 T2DM-women aged  $\geq 85$  years (Supplementary Table).

23 As can be seen in Table 1, the mean age was 80.72 years (SD, 5.65 years) in diabetic men and  
24 82.4 years (SD, 5.93 years) in men without diabetes. According to the CCI, 40.86% of men  
25 with T2DM had three or more coexisting conditions; in men without diabetes this figure was



1  
2  
3  
4  
5  
6  
7  
8  
9  
10  
11  
12  
13  
14  
15  
16  
17  
18  
19  
20  
21  
22  
23  
24  
25  
26  
27  
28  
29  
30  
31  
32  
33  
34  
35  
36  
37  
38  
39  
40  
41  
42  
43  
44  
45  
46  
47  
48  
49  
50  
51  
52  
53  
54  
55  
56  
57  
58  
59  
60

1 39.3%. The percentage of men with T2DM who have two or more coexisting conditions is  
2 slightly higher than that of non-diabetic men (81% vs. 79.71%)

For peer review only

**Table 1. Characteristic, Charlson Comorbidity Index and clinical conditions among men with and without type 2 diabetes hospitalized with vascular dementia. Analysis of the Spanish National Hospital Discharge Database from 2004 to 2013.**

|                                     | 2004        | 2005        | 2006        | 2007        | 2008        | 2009        | 2010        | 2011        | 2012        | 2013        | Total        | p-value |
|-------------------------------------|-------------|-------------|-------------|-------------|-------------|-------------|-------------|-------------|-------------|-------------|--------------|---------|
| No Diabetes                         |             |             |             |             |             |             |             |             |             |             |              |         |
| N                                   | 4185        | 4511        | 4697        | 4889        | 5152        | 5346        | 5705        | 5892        | 5877        | 6083        | 52337        | <0.001  |
| Incidence                           | 255.04      | 256.93      | 251.11      | 261.37      | 280.32      | 296.14      | 316.02      | 325.64      | 324.81      | 335.44      | 290.47       |         |
| Age, mean (SD)                      | 81.28(6.01) | 81.32(5.82) | 81.64(5.92) | 82(6.06)    | 81.9(5.95)  | 82.61(5.95) | 82.78(5.83) | 83.01(5.71) | 83.15(5.88) | 83.41(5.76) | 82.4(5.93)   | <0.001  |
| 70-74 years old, n (%)              | 626(14.96)  | 610(13.52)  | 572(12.18)  | 597(12.21)  | 630(12.23)  | 509(9.52)   | 513(8.99)   | 426(7.23)   | 491(8.35)   | 461(7.58)   | 5435(10.38)  | 0.000   |
| 75-79 years old, n (%)              | 1053(25.16) | 1154(25.58) | 1173(24.97) | 1132(23.15) | 1215(23.58) | 1167(21.83) | 1162(20.37) | 1223(20.76) | 1071(18.22) | 1075(17.67) | 11425(21.83) |         |
| 80-84 years old, n (%)              | 1247(29.8)  | 1413(31.32) | 1493(31.79) | 1490(30.48) | 1541(29.91) | 1556(29.11) | 1760(30.85) | 1839(31.21) | 1808(30.76) | 1878(30.87) | 16025(30.62) |         |
| ≥85 years old, n(%)                 | 1259(30.08) | 1334(29.57) | 1459(31.06) | 1670(34.16) | 1766(34.28) | 2114(39.54) | 2270(39.79) | 2404(40.8)  | 2507(42.66) | 2669(43.88) | 19452(37.17) |         |
| Charlson Comorbidity Index1, n (%)  | 934(22.32)  | 962(21.33)  | 1019(21.69) | 1015(20.76) | 1119(21.72) | 1124(21.03) | 1119(19.61) | 1113(18.89) | 1091(18.56) | 1126(18.51) | 10622(20.3)  | 0.000   |
| Charlson Comorbidity Index2, n (%)  | 1748(41.77) | 1968(43.63) | 1927(41.03) | 2048(41.89) | 2072(40.22) | 2195(41.06) | 2281(39.98) | 2330(39.55) | 2219(37.76) | 2359(38.78) | 21147(40.41) |         |
| Charlson Comorbidity Index≥3, n (%) | 1503(35.91) | 1581(35.05) | 1751(37.28) | 1826(37.35) | 1961(38.06) | 2027(37.92) | 2305(40.4)  | 2449(41.56) | 2567(43.68) | 2598(42.71) | 20568(39.3)  |         |
| Previous stroke                     | 1963(46.91) | 2114(46.86) | 2320(49.39) | 2305(47.15) | 2528(49.07) | 2649(49.55) | 2949(51.69) | 2976(50.51) | 3059(52.05) | 3148(51.75) | 26011(49.70) | <0.001  |
| Atrial fibrillation, n (%)          | 830(19.83)  | 907(20.11)  | 1030(21.93) | 1095(22.4)  | 1155(22.42) | 1270(23.76) | 1397(24.49) | 1452(24.64) | 1488(25.32) | 1493(24.54) | 12117(23.15) | <0.001  |
| Hypertension, n (%)                 | 1398(33.41) | 1537(34.07) | 1707(36.34) | 1745(35.69) | 1883(36.55) | 2004(37.49) | 2196(38.49) | 2288(38.83) | 2349(39.97) | 2420(39.78) | 19527(37.31) | <0.001  |
| Malnutrition, n (%)                 | 104(2.49)   | 177(3.92)   | 185(3.94)   | 231(4.72)   | 243(4.72)   | 274(5.13)   | 251(4.4)    | 308(5.23)   | 280(4.76)   | 339(5.57)   | 2392(4.57)   | <0.001  |
| Pneumonia, n (%)                    | 1028(24.56) | 1180(26.16) | 1136(24.19) | 1260(25.77) | 1303(25.29) | 1448(27.09) | 1526(26.75) | 1594(27.05) | 1603(27.28) | 1638(26.93) | 13716(26.21) | <0.001  |
| Urinary tract infection, n (%)      | 682(16.3)   | 743(16.47)  | 790(16.82)  | 808(16.53)  | 881(17.1)   | 963(18.01)  | 992(17.39)  | 1079(18.31) | 1108(18.85) | 1150(18.91) | 9196(17.57)  | 0.001   |
| Agitation, n (%)                    | 16(0.38)    | 16(0.35)    | 16(0.34)    | 24(0.49)    | 22(0.43)    | 31(0.58)    | 36(0.63)    | 34(0.58)    | 32(0.54)    | 39(0.64)    | 266(0.51)    | 0.225   |
| Diabetes                            |             |             |             |             |             |             |             |             |             |             |              |         |
| N                                   | 1703        | 2000        | 2297        | 2376        | 2578        | 2735        | 2887        | 3057        | 3313        | 3216        | 26162        | <0.001  |
| Incidence                           | 450.73      | 501.91      | 548.05      | 566.9       | 578.82      | 579.89      | 612.11      | 591.26      | 640.77      | 571.82      | 568.77       |         |
| Age, mean (SD)                      | 79.6(5.59)  | 79.74(5.58) | 79.84(5.57) | 80.2(5.6)   | 80.43(5.6)  | 80.51(5.65) | 81.01(5.46) | 81.37(5.62) | 81.49(5.65) | 81.71(5.66) | 80.72(5.65)  | <0.001  |
| 70-74 years old, n (%)              | 342(20.08)  | 393(19.65)  | 438(19.07)  | 400(16.84)  | 413(16.02)  | 426(15.58)  | 376(13.02)  | 388(12.69)  | 392(11.83)  | 352(10.95)  | 3920(14.98)  | 0.000   |
| 75-79 years old, n (%)              | 540(31.71)  | 621(31.05)  | 683(29.73)  | 752(31.65)  | 767(29.75)  | 791(28.92)  | 759(26.29)  | 789(25.81)  | 855(25.81)  | 811(25.22)  | 7368(28.16)  |         |
| 80-84 years old, n (%)              | 487(28.6)   | 599(29.95)  | 728(31.69)  | 669(28.16)  | 786(30.49)  | 855(31.26)  | 959(33.22)  | 939(30.72)  | 1048(31.63) | 1019(31.69) | 8089(30.92)  |         |
| ≥85 years old, n(%)                 | 334(19.61)  | 387(19.35)  | 448(19.5)   | 555(23.36)  | 612(23.74)  | 663(24.24)  | 793(27.47)  | 941(30.78)  | 1018(30.73) | 1034(32.15) | 6785(25.93)  |         |
| Charlson Comorbidity Index1, n (%)  | 348(20.43)  | 398(19.9)   | 490(21.33)  | 508(21.38)  | 509(19.74)  | 494(18.06)  | 513(17.77)  | 558(18.25)  | 594(17.93)  | 559(17.38)  | 4971(19)     | 0.000   |
| Charlson Comorbidity Index2, n (%)  | 710(41.69)  | 784(39.2)   | 925(40.27)  | 942(39.65)  | 1079(41.85) | 1095(40.04) | 1191(41.25) | 1200(39.25) | 1341(40.48) | 1234(38.37) | 10501(40.14) |         |
| Charlson Comorbidity Index≥3, n (%) | 645(37.87)  | 818(40.9)   | 882(38.4)   | 926(38.97)  | 990(38.4)   | 1146(41.9)  | 1183(40.98) | 1299(42.49) | 1378(41.59) | 1423(44.25) | 10690(40.86) |         |
| Previous stroke                     | 791(46.45)  | 992(49.6)   | 1071(46.63) | 1099(46.25) | 1267(49.15) | 1437(52.54) | 1476(51.13) | 1517(49.62) | 1660(50.11) | 1695(52.71) | 13005(49.71) | <0.001  |
| Atrial fibrillation, n (%)          | 319(18.73)  | 409(20.45)  | 443(19.29)  | 454(19.11)  | 521(20.21)  | 574(20.99)  | 591(20.47)  | 639(20.9)   | 700(21.13)  | 678(21.08)  | 5328(20.37)  | 0.331   |
| Hypertension, n (%)                 | 780(45.8)   | 945(47.25)  | 1087(47.32) | 1201(50.55) | 1303(50.54) | 1410(51.55) | 1456(50.43) | 1517(49.62) | 1653(49.89) | 1647(51.21) | 12999(49.69) | 0.001   |
| Malnutrition, n (%)                 | 41(2.41)    | 58(2.9)     | 85(3.7)     | 73(3.07)    | 81(3.14)    | 110(4.02)   | 127(4.4)    | 121(3.96)   | 127(3.83)   | 117(3.64)   | 940(3.59)    | 0.010   |
| Pneumonia, n (%)                    | 390(22.9)   | 431(21.55)  | 490(21.33)  | 536(22.56)  | 599(23.24)  | 651(23.8)   | 706(24.45)  | 768(25.12)  | 804(24.27)  | 763(23.73)  | 6138(23.46)  | 0.024   |
| Urinary tract infection, n (%)      | 299(17.56)  | 335(16.75)  | 351(15.28)  | 392(16.5)   | 449(17.42)  | 500(18.28)  | 520(18.01)  | 578(18.91)  | 580(17.51)  | 573(17.82)  | 4577(17.49)  | 0.059   |
| Agitation, n (%)                    | 6(0.35)     | 6(0.3)      | 6(0.26)     | 4(0.17)     | 10(0.39)    | 14(0.51)    | 13(0.45)    | 13(0.43)    | 20(0.6)     | 19(0.59)    | 111(0.42)    | 0.254   |

*N: Number of discharges; Incidence: per 100,000 inhabitants; Comorbidities included in the Charlson comorbidity index, except diabetes and dementia. P value for comparison by year. Poisson regression model for incidence rates, ANOVA for means, Pearson's chi-square for proportions.*

1  
2  
3 1 The prevalence of previous stroke was similar and near to 50% among men with and without  
4  
5 2 diabetes in all years studied and rose significantly over time ( $p<0.001$ ) from around 46% to  
6  
7 3 52% in both groups of patients. Hypertension was significantly more prevalent in diabetic  
8  
9 4 men than in those without diabetes (49.69% and 37.31%, respectively), but atrial fibrillation,  
10  
11 5 malnutrition, pneumonia and agitation were more frequent in non-diabetic men (Table 1).

12  
13  
14 6 The estimated adjusted incidence of discharges due to VaD in men with diabetes increased  
15  
16 7 significantly from 450.73 cases in 2004 to 571.82 cases per 100,000 diabetic men in 2013. In  
17  
18 8 the men without diabetes, the incidence rate increased significantly from 255.04 cases in 2004  
19  
20 9 to 335.44 cases per 100,000 non-diabetic patients in 2013. The incidences were higher among  
21  
22 10 men with diabetes than those without diabetes in all the years studied (Table 1).

23  
24  
25 11 As can be seen in Table 1, for both groups studied, a significant increase in the mean age,  
26  
27 12 higher values of CCI and an increase in the prevalence of hypertension were observed over  
28  
29 13 the study period.

30  
31  
32 14 We found that the proportion of patients with malnutrition has significantly increased over  
33  
34 15 time, ranging from 2.49% in 2004 to 5.57% in 2013 in men without T2DM, and from 2.41%  
35  
36 16 to 3.64% in those with diabetes over the study period ( $p<0.05$ ). In both diabetic and non-  
37  
38 17 diabetic men, we found that pneumonia increased significantly over time. In non-diabetic  
39  
40 18 men, urinary tract infections increased from 16.3% to 18.91% ( $p<0.05$ ); however, in diabetic  
41  
42 19 men this infectious complication remained stable. Agitation has remained stable over time in  
43  
44 20 both groups (Table 1).

45  
46  
47 21 Over the study period, 54% of all VaD hospitalizations were women. The mean age for  
48  
49 22 women with T2DM was significantly lower than in those without diabetes (83.17 years vs.  
50  
51 23 85.01 years). Women with T2DM had higher CCI values compared to those without diabetes  
52  
53 24 (29.21% and 26.8% with three or more coexisting conditions, respectively) (Table 2).

**Table 2. Characteristic, Charlson Comorbidity Index and clinical conditions among women with and without type 2 diabetes hospitalized with vascular dementia. Analysis of the Spanish National Hospital Discharge Database from 2004 to 2013.**

|                                     | 2004        | 2005        | 2006        | 2007        | 2008        | 2009        | 2010        | 2011        | 2012        | 2013        | Total        | p-value |
|-------------------------------------|-------------|-------------|-------------|-------------|-------------|-------------|-------------|-------------|-------------|-------------|--------------|---------|
| <b>No Diabetes</b>                  |             |             |             |             |             |             |             |             |             |             |              |         |
| N                                   | 4489        | 5089        | 5018        | 5313        | 6007        | 6066        | 6448        | 6881        | 7167        | 7124        | 59602        |         |
| Incidence                           | 192.92      | 210.3       | 199.7       | 211.44      | 234.61      | 232.59      | 247.23      | 260.71      | 271.55      | 266.76      | 233.75       | <0.001  |
| Age, mean (SD)                      | 83.93(6.01) | 84.19(5.99) | 84.27(6.07) | 84.59(5.94) | 84.76(5.95) | 85.16(5.88) | 85.24(5.87) | 85.54(5.75) | 85.65(5.69) | 85.88(5.79) | 85.01(5.91)  | <0.001  |
| 70-74 years old, n (%)              | 340(7.57)   | 310(6.09)   | 328(6.54)   | 293(5.51)   | 289(4.81)   | 266(4.39)   | 260(4.03)   | 220(3.2)    | 246(3.43)   | 214(3)      | 2766(4.64)   | <0.001  |
| 75-79 years old, n (%)              | 693(15.44)  | 813(15.98)  | 770(15.34)  | 761(14.32)  | 879(14.63)  | 782(12.89)  | 844(13.09)  | 854(12.41)  | 787(10.98)  | 794(11.15)  | 7977(13.38)  |         |
| 80-84 years old, n (%)              | 1337(29.78) | 1486(29.2)  | 1465(29.19) | 1544(29.06) | 1669(27.78) | 1609(26.52) | 1657(25.7)  | 1718(24.97) | 1861(25.97) | 1758(24.68) | 16104(27.02) |         |
| ≥85 years old, n(%)                 | 2119(47.2)  | 2480(48.73) | 2455(48.92) | 2715(51.1)  | 3170(52.77) | 3409(56.2)  | 3687(57.18) | 4089(59.42) | 4273(59.62) | 4358(61.17) | 32755(54.96) |         |
| Charlson Comorbidity Index1, n (%)  | 1346(29.98) | 1640(32.23) | 1565(31.19) | 1615(30.4)  | 1849(30.78) | 1746(28.78) | 1736(26.92) | 1808(26.28) | 1913(26.69) | 1772(24.87) | 16990(28.51) | <0.001  |
| Charlson Comorbidity Index2, n (%)  | 2065(46)    | 2264(44.49) | 2242(44.68) | 2382(44.83) | 2656(44.22) | 2734(45.07) | 2957(45.86) | 3093(44.95) | 3112(43.42) | 3131(43.95) | 26636(44.69) |         |
| Charlson Comorbidity Index≥3, n (%) | 1078(24.01) | 1185(23.29) | 1211(24.13) | 1316(24.77) | 1502(25)    | 1586(26.15) | 1755(27.22) | 1980(28.77) | 2142(29.89) | 2221(31.18) | 15976(26.8)  |         |
| Previous stroke                     | 2048(45.62) | 2333(45.84) | 2357(46.97) | 2406(45.29) | 2747(45.73) | 2906(47.91) | 3185(49.4)  | 3427(49.8)  | 3478(48.53) | 3552(49.86) | 28439(47.71) | <0.001  |
| Atrial fibrillation, n (%)          | 1185(26.4)  | 1311(25.76) | 1368(27.26) | 1447(27.24) | 1645(27.38) | 1634(26.94) | 1799(27.9)  | 2015(29.28) | 2068(28.85) | 2021(28.37) | 16493(27.67) | <0.001  |
| Hypertension, n (%)                 | 1889(42.08) | 2160(42.44) | 2196(43.76) | 2461(46.32) | 2759(45.93) | 2945(48.55) | 2988(46.34) | 3197(46.46) | 3409(47.57) | 3441(48.3)  | 27445(46.05) | <0.001  |
| Malnutrition, n (%)                 | 152(3.39)   | 205(4.03)   | 231(4.6)    | 231(4.35)   | 301(5.01)   | 317(5.23)   | 352(5.46)   | 381(5.54)   | 365(5.09)   | 406(5.7)    | 2941(4.93)   | <0.001  |
| Pneumonia, n (%)                    | 783(17.44)  | 988(19.41)  | 898(17.9)   | 916(17.24)  | 1162(19.34) | 1180(19.45) | 1252(19.42) | 1299(18.88) | 1442(20.12) | 1350(18.95) | 11270(18.91) | <0.001  |
| Urinary tract infection, n (%)      | 871(19.4)   | 999(19.63)  | 1077(21.46) | 1070(20.14) | 1308(21.77) | 1394(22.98) | 1475(22.88) | 1634(23.75) | 1565(21.84) | 1681(23.6)  | 13074(21.94) | <0.001  |
| Agitation, n (%)                    | 13(0.29)    | 18(0.35)    | 19(0.38)    | 15(0.28)    | 27(0.45)    | 20(0.33)    | 21(0.33)    | 41(0.6)     | 21(0.29)    | 31(0.44)    | 226(0.38)    | 0.103   |
| <b>Diabetes</b>                     |             |             |             |             |             |             |             |             |             |             |              |         |
| N                                   | 2326        | 2553        | 2852        | 2920        | 3192        | 3525        | 3546        | 3841        | 3852        | 3899        | 32506        |         |
| Incidence                           | 410.63      | 457.16      | 518.13      | 530.48      | 533.07      | 544.7       | 547.95      | 524.92      | 526.42      | 477.63      | 508.01       | <0.001  |
| Age, mean (SD)                      | 82.01(5.83) | 82.21(6.07) | 82.43(6.06) | 82.75(6)    | 83.12(6)    | 83.16(5.85) | 83.35(5.75) | 83.72(5.87) | 83.68(5.78) | 84.15(5.77) | 83.17(5.92)  | <0.001  |
| 70-74 years old, n (%)              | 270(11.61)  | 287(11.24)  | 297(10.41)  | 292(10)     | 279(8.74)   | 298(8.45)   | 242(6.82)   | 243(6.33)   | 254(6.59)   | 220(5.64)   | 2682(8.25)   | <0.001  |
| 75-79 years old, n (%)              | 530(22.79)  | 584(22.88)  | 634(22.23)  | 582(19.93)  | 645(20.21)  | 667(18.92)  | 692(19.51)  | 710(18.48)  | 669(17.37)  | 600(15.39)  | 6313(19.42)  |         |
| 80-84 years old, n (%)              | 742(31.9)   | 775(30.36)  | 862(30.22)  | 879(30.1)   | 911(28.54)  | 1063(30.16) | 1093(30.82) | 1144(29.78) | 1165(30.24) | 1179(30.24) | 9813(30.19)  |         |
| ≥85 years old, n(%)                 | 784(33.71)  | 907(35.53)  | 1059(37.13) | 1167(39.97) | 1357(42.51) | 1497(42.47) | 1519(42.84) | 1744(45.4)  | 1764(45.79) | 1900(48.73) | 13698(42.14) |         |
| Charlson Comorbidity Index1, n (%)  | 638(27.43)  | 694(27.18)  | 776(27.21)  | 809(27.71)  | 854(26.75)  | 971(27.55)  | 934(26.34)  | 949(24.71)  | 998(25.91)  | 931(23.88)  | 8554(26.32)  | <0.001  |
| Charlson Comorbidity Index2, n (%)  | 1064(45.74) | 1180(46.22) | 1269(44.5)  | 1307(44.76) | 1434(44.92) | 1610(45.67) | 1599(45.09) | 1701(44.29) | 1632(42.37) | 1660(42.58) | 14456(44.47) |         |
| Charlson Comorbidity Index≥3, n (%) | 624(26.83)  | 679(26.6)   | 807(28.3)   | 804(27.53)  | 904(28.32)  | 944(26.78)  | 1013(28.57) | 1191(31.01) | 1222(31.72) | 1308(33.55) | 9496(29.21)  |         |
| Previous stroke                     | 1138(48.93) | 1265(49.55) | 1413(49.54) | 1347(46.13) | 1587(49.72) | 1740(49.36) | 1749(49.32) | 1921(50.01) | 1872(48.6)  | 1934(49.6)  | 15966(49.12) | 0.142   |
| Atrial fibrillation, n (%)          | 594(25.54)  | 671(26.28)  | 747(26.19)  | 798(27.33)  | 880(27.57)  | 932(26.44)  | 920(25.94)  | 977(25.44)  | 1059(27.49) | 1118(28.67) | 8696(26.75)  | 0.045   |
| Hypertension, n (%)                 | 1237(53.18) | 1429(55.97) | 1643(57.61) | 1672(57.26) | 1871(58.62) | 2106(59.74) | 2077(58.57) | 2159(56.21) | 2180(56.59) | 2177(55.83) | 18551(57.07) | 0.000   |
| Malnutrition, n (%)                 | 41(1.76)    | 82(3.21)    | 105(3.68)   | 107(3.66)   | 123(3.85)   | 163(4.62)   | 126(3.55)   | 173(4.5)    | 167(4.34)   | 162(4.15)   | 1249(3.84)   | 0.000   |
| Pneumonia, n (%)                    | 342(14.7)   | 385(15.08)  | 420(14.73)  | 457(15.65)  | 529(16.57)  | 634(17.99)  | 584(16.47)  | 607(15.8)   | 631(16.38)  | 650(16.67)  | 5239(16.12)  | 0.011   |
| Urinary tract infection, n (%)      | 518(22.27)  | 592(23.19)  | 720(25.25)  | 703(24.08)  | 814(25.5)   | 920(26.1)   | 879(24.79)  | 966(25.15)  | 971(25.21)  | 962(24.67)  | 8045(24.75)  | 0.044   |
| Agitation, n (%)                    | 4(0.17)     | 8(0.31)     | 4(0.14)     | 7(0.24)     | 12(0.38)    | 6(0.17)     | 9(0.25)     | 16(0.42)    | 9(0.23)     | 16(0.41)    | 91(0.28)     | 0.266   |

*N: Number of discharges; Incidence: per 100,000 inhabitants; Comorbidities included in the Charlson comorbidity index, except diabetes and dementia. P value for comparison by year. Poisson regression model for incidence rates, ANOVA for means, Pearson's chi-square for proportions.*

1  
2  
3 1 Among women, the overall prevalence of previous stroke was significantly higher for diabetic  
4  
5 2 than non-diabetics (49.12% vs. 47.71%). Only among women without diabetes a significant  
6  
7 3 increase was found from 2004 to 2013. Hypertension was more frequent in women with  
8  
9 4 diabetes than in women without T2DM (57.07% vs. 46.05%). However, the prevalence of  
10  
11 5 atrial fibrillation was slightly higher in non-diabetic women than in diabetic ones (27.67% vs.  
12  
13 6 26.75%) (Table 2).

14  
15  
16 7 As can be seen in Table 2, the incidence rate of hospitalization among women with T2DM  
17  
18 8 increased significantly, from 410.63 cases per 100,000 diabetic women in 2004 to 477.63  
19  
20 9 cases in 2013. Incidence rates also increased from 192.92 cases per 100,000 in 2003 to 266.76  
21  
22 10 cases in 2013 ( $p < 0.05$ ) among non-diabetic women. As seen with men, rates were consistently  
23  
24 11 higher in diabetic women.

25  
26  
27 12 A significant increase in the mean age, comorbidity, hypertension and in the prevalence of  
28  
29 13 atrial fibrillation was observed in women with and without diabetes over the study period. We  
30  
31 14 found an increase in the prevalence of malnutrition, pneumonia and urinary tract infections  
32  
33 15 during hospitalization in both diabetic and non-diabetic women (Table 2).

34  
35  
36 16 If we compare diabetic men with diabetic women, we find that men have a higher adjusted  
37  
38 17 incidence rate than women in all years analyzed. Diabetic men are significantly younger  
39  
40 18 (80.72 vs. 83.17 years) and have a CCI  $\geq 3$ , (40.86% vs. 29.21%) in greater proportion than  
41  
42 19 women over the study period. On the other hand, diabetic women showed more atrial  
43  
44 20 fibrillation (26.75% vs. 20.37%) and hypertension (57.07% vs. 49.69%) than diabetic men.

45  
46  
47 21 The IHM among men with or without T2DM did not change significantly over the period of  
48  
49 22 study, ranging from 16.62% to 14.49% in diabetic patients and from 17.08% to 16.29% in  
50  
51 23 non-diabetic patients (Table 3).

**Table 3. Hospitalizations outcomes, diagnosis and therapeutic procedures among men with and without type 2 diabetes hospitalized with vascular dementia. Analysis of the Spanish National Hospital Discharge Database from 2004 to 2013.**

|                                | 2004        | 2005        | 2006        | 2007        | 2008        | 2009       | 2010        | 2011        | 2012        | 2013        | Total       | p-value |
|--------------------------------|-------------|-------------|-------------|-------------|-------------|------------|-------------|-------------|-------------|-------------|-------------|---------|
| No Diabetes                    |             |             |             |             |             |            |             |             |             |             |             |         |
| In hospital mortality, n (%)   | 715(17.08)  | 770(17.07)  | 787(16.76)  | 817(16.71)  | 834(16.19)  | 847(15.84) | 902(15.81)  | 974(16.53)  | 1024(17.42) | 991(16.29)  | 8661(16.55) | 0.334   |
| LOHS, median (IQR)             | 9(9)        | 8(10)       | 8(9)        | 8(9)        | 8(9)        | 8(9)       | 8(9)        | 8(9)        | 7(8)        | 7(8)        | 8(9)        | <0.001  |
| Readmission, n (%)             | 589(14.07)  | 654(14.5)   | 725(15.44)  | 767(15.69)  | 824(15.99)  | 875(16.37) | 896(15.71)  | 975(16.55)  | 899(15.3)   | 891(14.65)  | 8095(15.47) | 0.007   |
| CAT, n (%)                     | 1097(26.21) | 1061(23.52) | 1089(23.19) | 1135(23.22) | 1189(23.08) | 1251(23.4) | 1283(22.49) | 1330(22.57) | 1250(21.27) | 1298(21.34) | 11983(22.9) | <0.001  |
| Magnetic Resonance, n (%)      | 135(3.23)   | 146(3.24)   | 128(2.73)   | 164(3.35)   | 193(3.75)   | 178(3.33)  | 208(3.65)   | 193(3.28)   | 179(3.05)   | 179(2.94)   | 1703(3.25)  | 0.127   |
| PEG, n (%)                     | 36(0.86)    | 42(0.93)    | 38(0.81)    | 35(0.72)    | 43(0.83)    | 61(1.14)   | 65(1.14)    | 50(0.85)    | 50(0.85)    | 55(0.9)     | 475(0.91)   | 0.348   |
| Parenteral nutrition, n (%)    | 71(1.7)     | 79(1.75)    | 81(1.72)    | 79(1.62)    | 98(1.9)     | 86(1.61)   | 99(1.74)    | 100(1.7)    | 94(1.6)     | 121(1.99)   | 908(1.73)   | 0.853   |
| Mechanical ventilation, n (%)  | 32(0.76)    | 28(0.62)    | 39(0.83)    | 42(0.86)    | 50(0.97)    | 52(0.97)   | 81(1.42)    | 93(1.58)    | 129(2.19)   | 105(1.73)   | 651(1.24)   | <0.001  |
| Bladder Catheterization, n (%) | 145(3.46)   | 147(3.26)   | 174(3.7)    | 195(3.99)   | 242(4.7)    | 273(5.11)  | 267(4.68)   | 295(5.01)   | 327(5.56)   | 338(5.56)   | 2403(4.59)  | <0.001  |
| Diabetes                       |             |             |             |             |             |            |             |             |             |             |             |         |
| In hospital mortality, n (%)   | 283(16.62)  | 327(16.35)  | 369(16.06)  | 373(15.7)   | 373(14.47)  | 419(15.32) | 447(15.48)  | 469(15.34)  | 476(14.37)  | 466(14.49)  | 4002(15.3)  | 0.303   |
| LOHS, median (IQR)             | 8(9)        | 9(9)        | 8(9)        | 8(9)        | 8(9)        | 8(9)       | 8(9)        | 7(8)        | 7(8)        | 7(8)        | 8(9)        | <0.001  |
| Readmission, n (%)             | 288(16.91)  | 358(17.9)   | 407(17.72)  | 416(17.51)  | 433(16.8)   | 481(17.59) | 493(17.08)  | 555(18.16)  | 556(16.78)  | 518(16.11)  | 4505(17.22) | 0.633   |
| CAT, n (%)                     | 433(25.43)  | 518(25.9)   | 568(24.73)  | 538(22.64)  | 603(23.39)  | 665(24.31) | 673(23.31)  | 732(23.95)  | 756(22.82)  | 775(24.1)   | 6261(23.93) | 0.169   |
| Magnetic Resonance, n (%)      | 60(3.52)    | 81(4.05)    | 96(4.18)    | 81(3.41)    | 105(4.07)   | 107(3.91)  | 117(4.05)   | 114(3.73)   | 108(3.26)   | 109(3.39)   | 978(3.74)   | 0.561   |
| PEG, n (%)                     | 9(0.53)     | 16(0.8)     | 15(0.65)    | 11(0.46)    | 21(0.81)    | 24(0.88)   | 14(0.48)    | 29(0.95)    | 28(0.85)    | 38(1.18)    | 205(0.78)   | 0.057   |
| Parenteral nutrition, n (%)    | 31(1.82)    | 29(1.45)    | 33(1.44)    | 37(1.56)    | 30(1.16)    | 44(1.61)   | 55(1.91)    | 31(1.01)    | 51(1.54)    | 59(1.83)    | 400(1.53)   | 0.134   |
| Mechanical ventilation, n (%)  | 7(0.41)     | 14(0.7)     | 20(0.87)    | 17(0.72)    | 28(1.09)    | 31(1.13)   | 33(1.14)    | 46(1.5)     | 63(1.9)     | 40(1.24)    | 299(1.14)   | <0.001  |
| Bladder Catheterization, n (%) | 48(2.82)    | 77(3.85)    | 68(2.96)    | 110(4.63)   | 88(3.41)    | 117(4.28)  | 132(4.57)   | 168(5.5)    | 156(4.71)   | 183(5.69)   | 1147(4.38)  | <0.001  |

LOHS: length of hospital stay; CAT: Computed tomography angiography; PEG: Percutaneous Endoscopic Gastrostomy. P value for comparison by year: Binary logistic regression for incidence, Kruskal-Wallis for medians, Pearson's chi-square for proportions.

1  
2  
3 1 The mean LOHS decreased significantly from 9 days in 2004 to 7 days in 2013 in non-  
4  
5 2 diabetic men and from 8 to 7 days in diabetic men ( $p<0.05$ ). Readmissions remained stable  
6  
7 3 approximately 17% over time for diabetic patients, while they slightly increased in non-  
8  
9 4 diabetic men ranging from 14.07% in 2004 to 14.65% in 2013 ( $p<0.05$ ).

10  
11 5 As can be seen in Table 3, a significant increase in the use of bladder catheterization was  
12  
13 6 found in diabetic men, raising from 2.82% in 2004 to 5.69% in 2013, and from 3.46% to  
14  
15 7 5.56% in the same period among those without the disease. The use of PEG has remained  
16  
17 8 stable at approximately 1% of hospitalizations due to VaD, both in diabetic and non-diabetic  
18  
19 9 patients. However, there has been a significant increase in the use of mechanical ventilation in  
20  
21 10 diabetic and non-diabetic men, ranging from 0.41% and 0.76% in 2004 to 1.24% and 1.73%  
22  
23 11 in 2013, respectively.

24  
25  
26  
27 12 Of the diagnostic procedures analyzed, the most commonly used was CAT (22.9% in non-  
28  
29 13 diabetic men and 23.93% in diabetic ones) followed by magnetic resonance (3.25% and  
30  
31 14 3.74%, respectively). The use of CAT in non-diabetic men has significantly decreased, while  
32  
33 15 it has remained stable in diabetic men over the study period.

34  
35  
36 16 The IHM among diabetic women with a VaD discharge did not change significantly over the  
37  
38 17 study period, as can be seen in Table 4. However, in women without diabetes the IHM  
39  
40 18 decreased significantly from 16.08% in 2004 to 14.42% in 2013. Over the 10-year study  
41  
42 19 period, the LOHS in women with and without diabetes decreased significantly ( $p<0.05$ ). We  
43  
44 20 found that readmissions significantly increased in non-diabetic women, ranging from 11.63%  
45  
46 21 in 2004 to 13.64% in 2013, while it remained stable over time for diabetic women.

**Table 4. Hospitalizations outcomes, diagnosis and therapeutic procedures among women with and without type 2 diabetes hospitalized with vascular dementia. Analysis of the Spanish National Hospital Discharge Database from 2004 to 2013.**

|                                | 2004       | 2005        | 2006        | 2007        | 2008        | 2009        | 2010        | 2011        | 2012        | 2013        | Total        | p-value |
|--------------------------------|------------|-------------|-------------|-------------|-------------|-------------|-------------|-------------|-------------|-------------|--------------|---------|
| No Diabetes                    |            |             |             |             |             |             |             |             |             |             |              |         |
| In hospital mortality, n (%)   | 722(16.08) | 846(16.62)  | 747(14.89)  | 772(14.53)  | 947(15.76)  | 928(15.3)   | 920(14.27)  | 1042(15.14) | 1085(15.14) | 1027(14.42) | 9036(15.16)  | 0.008   |
| LOHS, median (IQR)             | 8(9)       | 8(9)        | 8(9)        | 8(9)        | 8(9)        | 8(9)        | 7(9)        | 7(8)        | 7(7)        | 7(7)        | 8(9)         | <0.001  |
| Readmission, n (%)             | 522(11.63) | 591(11.61)  | 641(12.77)  | 686(12.91)  | 779(12.97)  | 769(12.68)  | 910(14.11)  | 963(14)     | 1026(14.32) | 972(13.64)  | 7859(13.19)  | <0.001  |
| CAT, n (%)                     | 1109(24.7) | 1182(23.23) | 1214(24.19) | 1280(24.09) | 1364(22.71) | 1338(22.06) | 1503(23.31) | 1525(22.16) | 1497(20.89) | 1570(22.04) | 13582(22.79) | <0.001  |
| Magnetic Resonance, n (%)      | 118(2.63)  | 120(2.36)   | 120(2.39)   | 136(2.56)   | 178(2.96)   | 165(2.72)   | 150(2.33)   | 202(2.94)   | 147(2.05)   | 181(2.54)   | 1517(2.55)   | 0.027   |
| PEG, n (%)                     | 47(1.05)   | 45(0.88)    | 48(0.96)    | 54(1.02)    | 57(0.95)    | 67(1.1)     | 77(1.19)    | 64(0.93)    | 93(1.3)     | 51(0.72)    | 603(1.01)    | 0.058   |
| Parenteral nutrition, n (%)    | 76(1.69)   | 105(2.06)   | 116(2.31)   | 106(2)      | 110(1.83)   | 134(2.21)   | 133(2.06)   | 133(1.93)   | 134(1.87)   | 126(1.77)   | 1173(1.97)   | 0.378   |
| Mechanical ventilation, n (%)  | 30(0.67)   | 20(0.39)    | 27(0.54)    | 23(0.43)    | 35(0.58)    | 43(0.71)    | 51(0.79)    | 91(1.32)    | 106(1.48)   | 96(1.35)    | 522(0.88)    | <0.001  |
| Bladder Catheterization, n (%) | 79(1.76)   | 97(1.91)    | 126(2.51)   | 147(2.77)   | 168(2.8)    | 192(3.17)   | 229(3.55)   | 241(3.5)    | 222(3.1)    | 275(3.86)   | 1776(2.98)   | <0.001  |
| Diabetes                       |            |             |             |             |             |             |             |             |             |             |              |         |
| In hospital mortality, n (%)   | 343(14.75) | 383(15)     | 408(14.31)  | 447(15.31)  | 452(14.16)  | 516(14.64)  | 484(13.65)  | 530(13.8)   | 562(14.59)  | 541(13.88)  | 4666(14.35)  | 0.641   |
| LOHS, median (IQR)             | 8(9)       | 8(9)        | 8(9)        | 8(9)        | 8(9)        | 8(8)        | 7(9)        | 7(8)        | 7(7)        | 7(7)        | 8(9)         | <0.001  |
| Readmission, n (%)             | 314(13.5)  | 370(14.49)  | 433(15.18)  | 452(15.48)  | 503(15.76)  | 594(16.85)  | 548(15.45)  | 625(16.27)  | 612(15.89)  | 594(15.23)  | 5045(15.52)  | 0.641   |
| CAT, n (%)                     | 625(26.87) | 650(25.46)  | 737(25.84)  | 728(24.93)  | 802(25.13)  | 838(23.77)  | 819(23.1)   | 955(24.86)  | 805(20.9)   | 869(22.29)  | 7828(24.08)  | <0.001  |
| Magnetic Resonance, n (%)      | 49(2.11)   | 52(2.04)    | 81(2.84)    | 55(1.88)    | 86(2.69)    | 97(2.75)    | 101(2.85)   | 118(3.07)   | 98(2.54)    | 91(2.33)    | 828(2.55)    | 0.037   |
| PEG, n (%)                     | 22(0.95)   | 22(0.86)    | 20(0.7)     | 32(1.1)     | 31(0.97)    | 37(1.05)    | 43(1.21)    | 34(0.89)    | 39(1.01)    | 24(0.62)    | 304(0.94)    | 0.290   |
| Parenteral nutrition, n (%)    | 63(2.71)   | 63(2.47)    | 72(2.52)    | 43(1.47)    | 66(2.07)    | 79(2.24)    | 59(1.66)    | 81(2.11)    | 60(1.56)    | 65(1.67)    | 651(2)       | 0.002   |
| Mechanical ventilation, n (%)  | 9(0.39)    | 12(0.47)    | 17(0.6)     | 14(0.48)    | 21(0.66)    | 28(0.79)    | 41(1.16)    | 63(1.64)    | 54(1.4)     | 41(1.05)    | 300(0.92)    | <0.001  |
| Bladder Catheterization, n (%) | 58(2.49)   | 58(2.27)    | 71(2.49)    | 90(3.08)    | 87(2.73)    | 105(2.98)   | 106(2.99)   | 139(3.62)   | 138(3.58)   | 163(4.18)   | 1015(3.12)   | <0.001  |

LOHS: length of hospital stay; CAT: Computed tomography angiography; PEG: Percutaneous Endoscopic Gastrostomy. P value for comparison by year: Binary logistic regression for incidence, Kruskal-Wallis for medians, Pearson's chi-square for proportions.



1  
2  
3 As observed for men, we found a significant increase in the use of mechanical ventilation,  
4 from 0.39% to 1.05% in diabetic women and from 0.67% to 1.35% in non-diabetic women  
5 with VaD over the study period. The most commonly used diagnostic procedure was CAT for  
6 both groups of women. However, it was used in a higher proportion among those women  
7 with rather than without diabetes in all the years studied. The use of magnetic resonance has  
8 increased in diabetic women over time.  
9

10  
11 When we compared hospitalization outcomes between diabetic men and women, we found  
12 higher crude IHM among men than women in the total study population (15.3% vs. 14.35%),  
13 in all the years studied. Readmission rates were also significantly higher among men than  
14 women (17.22% vs. 15.52%). The use of magnetic resonance was used in a significantly  
15 higher proportion of diabetic men than diabetic women (3.74% vs. 2.55%), and PEG was  
16 more frequently used among diabetic women (0.94% vs. 0.78%).  
17  
18

19  
20 The Poisson regression models conducted to assess the effect of the disease on the incidence  
21 of VaD hospitalizations from 2004 to 2013 in Spain, yielded an IRR for men with T2DM of  
22 2.14 (95% CI 2.11-2.16). This means that, after adjusting for possible confounders, the  
23 incidence among diabetic men was 2-fold higher than among non-diabetic men. The  
24 corresponding figure for women was 2.22 (95% CI 2.19-2.25).  
25  
26

27  
28 As can be seen in Table 5, among men and women with diabetes, IHM was significantly  
29 greater in older subjects (OR 1.48; 95% CI 1.38-1.59 and OR 1.54; 95% CI 1.40-1.69 in  $\geq 85$   
30 aged group compared with reference category of 70-74 years, respectively). IHM was  
31 significantly higher in diabetic men and women with more comorbidities (OR 1.35; 95% CI,  
32 1.27-1.42 and OR 1.62; 95% CI, 1.54-1.70 for those men and women with  $\geq 3$  comorbidities).  
33  
34 IHM was also significantly higher in those men and women with pneumonia (OR 2.5; 95%  
35 CI, 2.44-2.65 and OR 2.64; 95% CI, 2.53-2.75) and in those with atrial fibrillation (OR 1.15;  
36 95% CI, 1.09-1.20 and OR 1.21; 95% CI 1.16-1.26, respectively).  
37  
38  
39  
40  
41  
42  
43  
44  
45  
46  
47  
48  
49  
50  
51  
52  
53  
54  
55  
56  
57  
58  
59  
60

**Table 5. Factors associated to in hospital mortality among men and women with and without type 2 diabetes hospitalized with vascular dementia. Analysis of the Spanish National Hospital Discharge Database from 2004 to 2013.**

|                            |               | Men             | Woman           | BOTH             |
|----------------------------|---------------|-----------------|-----------------|------------------|
|                            |               | OR (95CI%)      | OR (95CI%)      | OR (95CI%)       |
| Sex                        | Men           | NA              | NA              | 1.01(0.98-1.04)  |
| Age group                  | 70-74 years   | 1               | 1               | 1                |
|                            | 75-79 years   | 1.07(0.99-1.15) | 1.11(1.01-1.23) | 1.08(1.052-1.15) |
|                            | 80-84 years   | 1.24(1.15-1.33) | 1.24(1.13-1.37) | 1.24(1.17-1.31)  |
|                            | ≥85 years     | 1.48(1.38-1.59) | 1.54(1.40-1.69) | 1.51(1.42-1.60)  |
| Charlson Comorbidity Index | One           | 1               | 1               | 1                |
|                            | Two           | 1.11(1.05-1.17) | 1.23(1.17-1.29) | 1.18(1.13-1.22)  |
|                            | Three or over | 1.35(1.27-1.42) | 1.62(1.54-1.70) | 1.49(1.43-1.54)  |
| Atrial fibrillation        |               | 1.15(1.09-1.20) | 1.21(1.16-1.26) | 1.18(1.15-1.22)  |
| Hypertension               |               | 0.83(0.80-0.87) | 0.87(0.84-0.90) | 0.85(0.83-0.87)  |
| Malnutrition               |               | 0.91(0.83-1.00) | 0.91(0.83-0.99) | 0.91(0.85-0.97)  |
| Pneumonia                  |               | 2.55(2.44-2.65) | 2.64(2.53-2.75) | 2.59(2.52-2.67)  |
| Urinary tract infection    |               | 0.85(0.81-0.90) | 0.79(0.75-0.83) | 0.82(0.79-0.85)  |
| LOHS (days)                |               | 0.98(0.97-0.99) | 0.98(0.97-0.99) | 0.98(0.97-0.99)  |
| Readmission                |               | 1.45(1.38-1.52) | 1.38(1.31-1.44) | 1.41(1.36-1.46)  |
| CAT                        |               | 0.69(0.66-0.73) | 0.67(0.64-0.71) | 0.68(0.66-0.71)  |
| Magnetic Resonance         |               | 0.37(0.31-0.45) | 0.25(0.20-0.32) | 0.32(0.27-0.37)  |
| PEG                        |               | 0.44(0.34-0.57) | 0.32(0.24-0.42) | 0.37(0.31-0.45)  |
| Parenteral nutrition       |               | 1.45(1.27-1.66) | 1.17(1.03-1.32) | 1.29(1.18-1.41)  |
| Mechanical ventilation     |               | 2.98(2.59-3.43) | 2.67(2.29-3.11) | 2.83(2.55-3.14)  |
| Type 2 Diabetes            |               | 0.99(0.95-1.04) | 1.01(0.97-1.05) | 1.00(0.98-1.03)  |
| Year                       |               | 0.97(0.96-0.98) | 0.97(0.96-0.98) | 0.97(0.96-0.98)  |

LOHS: length of hospital stay; CAT: Computed tomography angiography; PEG: Percutaneous Endoscopic Gastrostomy

The diabetic men and women who received mechanical ventilation had a higher probability of dying (2.98-fold and 2.67-fold, respectively) during their hospital stay than those who did not undergo this procedure. The use of PEG was associated with a reduced IHM among both diabetic men and women admitted for VaD (OR 0.44; 95% CI, 0.34-0.45 and OR 0.32; 95% CI, 0.24-0.42, respectively). In contrast, patients who received parenteral nutrition were more

1  
2  
3 likely to die during their stay (OR 1.45; 95% CI, 1.27-1.66 and OR 1.17; 95% CI, 1.03-1.32,  
4  
5 respectively).

6  
7 Time-trend analysis showed a significant decrease in IHM from 2004 to 2013 in diabetic men  
8  
9 and women (OR 0.97; 95% CI 0.96-0.98). When we analyzed the entire database, and after  
10  
11 adjusting for all covariates, suffering from diabetes was not associated with a higher IHM in  
12  
13 either men or women (OR 0.99; 95% CI, 0.95-1.04 and OR 1.01; 95% CI 0.97-1.05).

## 14 15 16 **DISCUSSION**

17  
18 In this study of more than 170,000 admissions for VaD, we found that the prevalence of  
19  
20 T2DM among men and women hospitalized has increased over time in all age groups.  
21  
22 This finding is not surprising because the prevalence of diabetes and dementia are both  
23  
24 rapidly increasing. [2,6]

25  
26 The association between diabetes and the risk of dementia has received much attention in  
27  
28 epidemiological studies. [15] Ohara et al. reported an increase in the prevalence of all-cause  
29  
30 dementia in the Japanese population, [16] and diabetes was also identified as a significant  
31  
32 risk factor. Growing evidence in support of a biological relationship between diabetes and  
33  
34 VaD suggests a multifactorial pathogenesis that involves insulin metabolism, hyperglycemic  
35  
36 toxicity, chronic inflammation and vascular changes. [16,17] Diabetes is a known risk factor  
37  
38 for microvascular and macrovascular complications including stroke; [18] this suggests that  
39  
40 the relationship between diabetes and VaD is robust and not only driven by confounding. In  
41  
42 our study, age was the most strongly associated factor for VaD, and diabetic patients were  
43  
44 significantly younger than non-diabetic ones. Previous research has shown that patients with  
45  
46 both VaD and T2DM have a significantly earlier onset of VaD, a faster rate of cognitive  
47  
48 decline and a greater prevalence of neuropsychiatric symptoms than patients with VaD alone.  
49  
50 [19] In our study we found, as expected, a higher prevalence of hypertension among diabetic  
51  
52 patients compared to non-diabetics. It has been reported that arterial stiffness and small vessel  
53  
54  
55  
56  
57  
58  
59  
60

1  
2  
3 disease can predict future cognitive decline in elderly people with T2DM. [20]Over time, we  
4  
5 observed that people admitted to the hospital due to VaD were progressively older, with  
6  
7 increasing comorbid conditions and more hospital readmissions, which highlight the  
8  
9 increasing frailty of these patients. A link between comorbidity and the risk of dementia in  
10  
11 diabetic patients has also been published. [21]To further decrease the medical and social  
12  
13 economic burden associated with dementia, it seems necessary to focus on chronic disease  
14  
15 prevention.  
16  
17

18  
19 Infections, diabetes or their complications have been highlighted as common reasons for  
20  
21 hospital admission in patients with dementia. [22] In our study, pneumonia and urinary tract  
22  
23 infections significantly increased over the study period. The use of bladder catheterization  
24  
25 has significantly increased over time, which can contribute to the higher observed prevalence  
26  
27 of urinary tract infections, but they are not associated with higher mortality. However,  
28  
29 pneumonia is one of the infectious complications that has significantly increased over the  
30  
31 study period and is also associated with a worse prognosis. The use of mechanical ventilation  
32  
33 has also significantly increased, and it is also associated with higher IHM. This finding is  
34  
35 relevant because it seems to be a bidirectional relationship: hospitalization with pneumonia  
36  
37 has been associated with dementia and persistent cognitive dysfunction with severe  
38  
39 infections. [23] On the other hand, dysphagia occurs frequently in patients with dementia and  
40  
41 is related to aspiration pneumonia. Interestingly, we have found lower mortality in patients  
42  
43 fed by PEG. This protective effect could be associated with a better nutritional and hydration  
44  
45 status and potentially lower rates of aspiration pneumonia, but this is only a hypothesis  
46  
47 because our study was not designed to evaluate the association between PEG and pneumonia.  
48  
49 Furthermore, there is controversial evidence on this issue. Finucane et al. found no data to  
50  
51 suggest that tube feeding of patients with advanced dementia prevented aspiration  
52  
53 pneumonia, prolonged survival or provided palliation, [24] while Nakajoh et al. showed that  
54  
55  
56  
57  
58  
59  
60

1  
2  
3 the incidence of pneumonia was significantly higher in stroke patients with dysphagia who  
4 were fed orally compared to those who received tube feeding (54.3 vs. 13.2%, $p<0.001$ ). [25]

5  
6  
7 As has been described previously for ischemic and hemorrhagic stroke, we have not found an  
8 increased IHM due to VaD in patients with diabetes compared to those without. [18,26]  
9  
10 Despite the fact that obesity is recognized as a major risk factor in the development of  
11 cardiovascular diseases and diabetes, a higher BMI may be associated with a lower mortality  
12 and a better outcome in several chronic diseases. [27-29] During the past decade, there has  
13 been increasing evidence that patients, especially the elderly, with several chronic diseases  
14 and elevated BMI may demonstrate lower all-cause and cardiovascular mortality compared  
15 with patients of normal weight. [27] This observation has been referred to as “the obesity  
16 paradox”. [28,29] The protective effect of nutritional status in overweight and obese elderly  
17 individuals, and the health-deteriorating effects of undernutrition in non-overweight subjects,  
18 probably contribute to this paradox. Although unfortunately in our study the BMI of patients  
19 admitted for VaD was not registered, this could be a possible explanation. This hypothesis  
20 concerning a better nutritional status is consistent with the better outcomes described above  
21 in those patients undergoing PEG.  
22  
23  
24  
25  
26  
27  
28  
29  
30  
31  
32  
33  
34  
35  
36  
37

38 The strength of our investigation lies in its large sample size, its 10-year follow-up period and  
39 its standardized methodology. [30] Nevertheless, our study is subject to a series of  
40 limitations. CMBD contains administrative discharge data for hospitalizations and uses  
41 information that physician included in the discharge report. Therefore, we lack information  
42 on relevant variables that may act as confounders, such as VaD or T2DM duration or  
43 treatments for this last condition, among others. Calculation of incidence on the basis of a  
44 database without any access to socio-demographic variables is another limitation.  
45  
46  
47  
48  
49  
50  
51  
52

53 Another important limitation is the lack of specificity of clinically defined VaD. The  
54 cognitive impairment observed in VaD and AD plus atherosclerosis might overlap  
55  
56  
57  
58  
59  
60

1  
2  
3 extensively. We are aware that considering other databases, such as mortality registries, in  
4  
5 addition to discharge data would be advisable in order to detect patients with VaD dying  
6  
7 outside of a hospital, especially at nursing homes. Unfortunately, in Spain this process is still  
8  
9 unavailable for us.

10  
11 Finally, as we state in the ethics section patient identifiers were deleted before the database  
12  
13 was provided to us in order to maintain patient anonymity and it is not possible to identify  
14  
15 patients on individual levels, either in this article or in the database. Therefore it is impossible  
16  
17 for us to select a sample of study participant and to identify their medical records in order to  
18  
19 validate the VaD and T2DM diagnosis because we don't know in which hospital the  
20  
21 participant was admitted.

22  
23 Van de Vorst et al assessed the validity of the Dutch Hospital Discharge Register (HDR) for  
24  
25 vascular dementia by comparing the ICD 9 MD codes with medical records. These authors  
26  
27 concluded that the validity of using HDR codes to identify patients with dementia is high. For  
28  
29 VaD the positive predictive Value (PPV) was of 91.3% (95% CI 72.0-98.8%) and there were  
30  
31 no significant differences in PPV according to age, gender, setting of diagnosis, and  
32  
33 comorbidity.[31]

34  
35 Regarding the validity of diabetes diagnosis a recent review and meta-analysis found that a  
36  
37 commonly-used administrative database definition for diabetes (2 physician outpatient  
38  
39 billings and/or one hospitalization with a diabetes record on the discharge abstract summary  
40  
41 within a two-year period) has a pooled sensitivity of 82.3% (95%CI 75.8, 87.4) and  
42  
43 specificity of 97.9% (95%CI 96.5, 98.8%), based on the findings of six studies with complete  
44  
45 data available. [32]

46  
47 In Canada, Kokotailo et al found that, among patients with stroke, when compared with  
48  
49 hospital medical record the ICD 9 MD diagnosis of DM in the discharge report had a  
50  
51 sensitivity of 94% (95%CI 69–99) and an specificity of 98% (95%CI 91–99). [33]

## CONCLUSIONS

Our national data show that the incidence of VaD increased significantly during the period of study. Men and women with T2DM have more than double the risk of VaD admissions after adjusting for other risk factors. Patients admitted with VaD were progressively older and had multiple comorbidities. Pneumonia was associated with poorer prognosis, and the use of PEG was associated with reduced mortality. Diabetes was not associated with IHM, and the time-trends show that mortality is decreasing over time.

## ACKNOWLEDGEMENTS

We wish to thank to Spanish Ministry of Health and Social Policy for providing the records of Minimum Basic Data Set (CMBD).

## CONTRIBUTIONS

NMR, RJG and ALdA researched data, contributed to the discussion, wrote the manuscript, and reviewed/edited the manuscript. VHB researched data and reviewed/edited the manuscript. NMR-MMB-JMdMY-JdMD-RJG-ALdA contributed to the discussion and reviewed/edited the manuscript.

All authors reviewed and gave their final approval of the version to be submitted.

## COMPETING INTERESTS

The authors declare that they have no competing interests.

## DATA SHARING STATEMENT

"No additional data available"

## FUNDING

This study was funded by the FIS (*Fondo de Investigaciones Sanitarias*—Health Research Fund, grants no. PI13/00118 & PI16/00564, *Instituto de Salud Carlos III*) co-financed by the European Union through the *Fondo Europeo de Desarrollo Regional* (FEDER, “*Una manera de hacer Europa*”), and by the *Grupo de Excelencia Investigadora URJC-Banco Santander* No. 30VCPIGI03: *Investigación traslacional en el proceso de salud—enfermedad* (ITPSE).

The funders had no role in study design, data collection and analysis, decision to publish, or preparation of the manuscript.



## REFERENCES

1. Prince M, Bryce R, Albanese E, Wimo A, Ribeiro W, Ferri CP. The global prevalence of dementia: a systematic review and metaanalysis. *Alzheimers Dement* 2013;9:63-75.
2. World Health Organization. Dementia. <http://www.who.int/mediacentre/factsheets/fs362/en/>. Accessed February 10, 2017.
3. Arvanitakis Z, Capuano AW, Leurgans SE, Bennett DA, Schneider JA. Relation of cerebral vessel disease to Alzheimer's disease dementia and cognitive function in elderly people: a cross-sectional study. *Lancet Neurol* 2016;15:934-43.
4. Verdelho A, Madureira S, Ferro JM, et al Differential impact of cerebral white matter changes, diabetes, hypertension and stroke on cognitive performance among non-disabled elderly. The LADIS study. *J Neurol Neurosurg Psychiatry* 2007;78:1325-1330.
5. Launer LJ. Diabetes and brain aging: epidemiologic evidence. *Curr Diab Rep* 2005;5:59–63.
6. World Health Organization. Global Report on diabetes. [http://apps.who.int/iris/bitstream/10665/204871/1/9789241565257\\_eng.pdf](http://apps.who.int/iris/bitstream/10665/204871/1/9789241565257_eng.pdf). Accessed February 10, 2017.
7. Sato N, Morishita R. Brain alterations and clinical symptoms of dementia in diabetes: A $\beta$ /tau dependent and independent mechanisms. *Frontiers in endocrinology* 2014;5:143:1-8.
8. Bordier L, Doucet J, Boudet J, Bauduceau B. Update on cognitive decline and dementia in elderly patients with diabetes. *Diabetes Metab* 2014;40:331-7.
9. Li W, Huang E. An Update on Type 2 Diabetes Mellitus as a Risk Factor for Dementia. *J Alzheimers Dis* 2016;53:393-402.
10. Lu FP, Lin KP, Kuo HK. Diabetes and the risk of multi-system aging phenotypes: a systematic review and meta-analysis. *Plos One* 2009;4(1):e4144.

- 1  
2  
3 11. Chatterjee S, Peters SA, Woodward M, et al. Type 2 Diabetes as a Risk Factor for  
4 Dementia in Women compared With Men: A Pooled Analysis of 2.3 Million People  
5 Comprising More than 100.000 Cases of Dementia. *Diabetes Care* 2016;39:300-307.  
6  
7
- 8  
9 12. Fei M, Yan Ping Z, Ru Juan M, Ning Ning L, Lin G. Risk factors for dementia with type  
10 2 diabetes mellitus among elderly people in China. *Age Ageing* 2013;42:398-400.  
11
- 12 13. Instituto Nacional de Gestión Sanitaria, Ministerio de Sanidad, Servicios Sociales e  
13 Igualdad. Conjunto Mínimo Básico de Datos, Hospitales del INSALUD.  
14 <http://www.ingesa.msc.es/estadEstudios/documPublica/CMBD-2001.htm>. Accessed February  
15 10, 2017.  
16  
17
- 18 14. Charlson ME, Pompei P, Ales KL, MacKenzie CR. A new method of classifying  
19 prognostic comorbidity in longitudinal studies: development and validation. *J Chronic Dis*  
20 1987;40:373-383.  
21  
22
- 23 15. Ohara T. Epidemiology of Diabetes and risk of Dementia. *Brain Nerve* 2016;68:719-27.  
24
- 25 16. Ninomiya T. Diabetes mellitus and dementia. *Curr Diab Rep* 2014;14:487.  
26  
27
- 28 17. Ahtiluoto S, Polvikoski T, Peltonen M, et al. Diabetes, Alzheimer disease, and vascular  
29 dementia: a population-based neuropathologic study. *Neurology* 2010;75:1195-1202.  
30  
31
- 32 18. Muñoz-Rivas N, Méndez-Bailón M, Hernández-Barrera V, et al. Time Trends in  
33 Ischemic Stroke among Type 2 Diabetic and Non-Diabetic Patients: Analysis of the Spanish  
34 National Hospital Discharge Data (2003-2012). *PLoS ONE* 2015;10: e0145535.  
35  
36
- 37 19. Murthy SB, Jawaid A, Qureshi SU, et al. Does diabetes mellitus alter the onset and  
38 clinical course of vascular dementia. *Behav Neurol* 2010;23:145-51.  
39  
40
- 41 20. Brundel M, van den Heuvel M, de Bresser J, Kappelle LJ, Biessels GJ; Utrecht Diabetic  
42 Encephalopathy Study Group. Cerebral cortical thickness in patients with type 2 diabetes. *J*  
43 *Neurol Sci* 2010;299:126-30.  
44  
45  
46  
47  
48  
49  
50  
51  
52  
53  
54  
55  
56  
57  
58  
59  
60

- 1  
2  
3 21. Kuo SC, Lai SW, Hung HC, et al. Association between comorbidities and dementia in  
4 diabetes mellitus patients: population-based retrospective cohort study. *J Diabetes*  
5 *Complications* 2015;29(8):1071-6.  
6  
7  
8  
9  
10 22. Chang CC, Lin PH, Chang YT, et al. The impact of admission diagnosis on recurrent or  
11 frequent hospitalizations in 3 dementia subtypes: A hospital-based cohort in Taiwan with 4  
12 years longitudinal follow-ups. *Medicine (Baltimore)* 2015;94:e2091.  
13  
14  
15  
16 23. Tate AJ, Snitz BE, Alvarez KA, et al. Infection hospitalization increases risk of dementia  
17 in the elderly. *Crit Care Med* 2014;25:1037-1046.  
18  
19  
20  
21 24. Finucane, TE, Christmas, C, Travis, K. Tube feeding in patients with advanced dementia:  
22 a review of the evidence. *JAMA* 1999;282:1365-1370.  
23  
24  
25 25. Nakajoh, K, Nakagawa, T, Sekizawa, K, Matsui T, Arai H, Sasaki H. Relation between  
26 incidence of pneumonia and protective reflexes in post-stroke patients with oral or tube  
27 feeding. *J Intern Med* 2000;247:39-42.  
28  
29  
30  
31  
32 26. Muñoz-Rivas N, Méndez-Bailón M, Hernández-Barrera V, et al. Type 2 diabetes and  
33 hemorrhagic stroke: A population –based study in Spain from 2003-2012. *J Stroke*  
34 *Cerebrovasc Dis* 2016;25:1289-1560.  
35  
36  
37  
38 27. Hainer V, Aldhoon-Hainerová I. Obesity Paradox Does Exist. *Diabetes Care*  
39 2013;36:S276-S281.  
40  
41  
42  
43 28. Kalantar-Zadeh K, Block G, Horwich T, Fonaro GC. Reverse epidemiology of  
44 conventional cardiovascular risk factors in patients with chronic heart failure. *J Am Coll*  
45 *Cardiol* 2004;43:1439–1444.  
46  
47  
48  
49 29. Gruberg L, Weissman NJ, Waksman R, et al. The impact of obesity on the short-term and  
50 long-term outcomes after percutaneous coronary intervention: the obesity paradox?. *J Am*  
51 *Coll Cardiol* 2002;39:578–584.  
52  
53  
54  
55  
56  
57  
58  
59  
60

- 1  
2  
3 30. Lopez-de-Andres A, Jimenez-García R, Hernandez-Barrera V, et al. National trends in  
4 utilization and outcomes of coronary revascularization procedures among people with and  
5 without type 2 diabetes in Spain (2001-2011). *Cardiovasc Diabetol* 2014;13:3.  
6  
7  
8  
9  
10 31. van de Vorst IE, Vaartjes I, Sinnecker LF, Beks LJ, Bots ML, Koek HL. The validity of  
11 national hospital discharge register data on dementia: a comparative analysis using clinical  
12 data from a university medical centre. *Neth J Med*. 2015;73:69-75.  
13  
14  
15  
16 32. Leong A, Dasgupta K, Bernatsky S, Lacaille D, Avina-Zubieta A, Rahme E. Systematic  
17 review and meta-analysis of validation studies on a diabetes case definition from health  
18 administrative records. *PLoS One*. 2013;8: e75256.  
19  
20  
21  
22  
23 33. Kokotailo RA, Hill MD. Coding of stroke and stroke risk factors using international  
24 classification of diseases, revisions 9 and 10. *Stroke*. 2005;36:1776-81.  
25  
26  
27  
28  
29  
30  
31  
32  
33  
34  
35  
36  
37  
38  
39  
40  
41  
42  
43  
44  
45  
46  
47  
48  
49  
50  
51  
52  
53  
54  
55  
56  
57  
58  
59  
60

**Supplementary Table. Incidence of hospitalizations with vascular dementia among people with and without type 2 diabetes according to sex and age groups. Analysis of the Spanish National Hospital Discharge Database from 2004 to 2013.**

| Rate*<br>100.000/Inh | Diabetes | Age<br>group | 2004    | 2005    | 2006    | 2007    | 2008    | 2009    | 2010    | 2011    | 2012    | 2013    | Total   | p-value |        |
|----------------------|----------|--------------|---------|---------|---------|---------|---------|---------|---------|---------|---------|---------|---------|---------|--------|
| Men                  | No       | 70-74        | 94.44   | 89.32   | 81.36   | 84.92   | 95.68   | 82.91   | 83.57   | 68.93   | 79.45   | 74.1    | 83.66   | <0.001  |        |
|                      |          | 75-79        | 210.88  | 211.6   | 198.33  | 191.4   | 208.25  | 202.8   | 201.93  | 247.69  | 216.9   | 260.87  | 213.09  | <0.001  |        |
|                      |          | 80-84        | 436.5   | 423.05  | 390.5   | 389.72  | 413.81  | 429.29  | 485.58  | 437.61  | 430.23  | 392.87  | 421.69  | 0.372   |        |
|                      |          | ≥85          | 652.21  | 689.83  | 753.13  | 862.05  | 789.82  | 834.04  | 895.58  | 866.84  | 903.98  | 886.14  | 824.15  | <0.001  |        |
|                      | Yes      | 70-74        | 220.31  | 245.77  | 266.13  | 243.04  | 247.71  | 252.27  | 222.66  | 237.99  | 240.44  | 223.93  | 240.19  | 0.341   |        |
|                      |          | 75-79        | 437.4   | 496.19  | 538.43  | 592.83  | 527.72  | 482.81  | 463.28  | 434.65  | 471.01  | 407.09  | 479.19  | <0.001  |        |
|                      |          | 80-84        | 684.81  | 788.86  | 901.56  | 828.49  | 945.7   | 1000.27 | 1121.94 | 864.39  | 964.72  | 773.21  | 887.28  | 0.001   |        |
|                      |          | ≥85          | 1191.79 | 1032.39 | 954.29  | 1182.21 | 1218.95 | 1239.99 | 1483.13 | 1473.93 | 1594.54 | 1393.17 | 1308.71 | <0.001  |        |
|                      |          | Both         | 70-74   | 118.32  | 119.00  | 116.41  | 114.92  | 126.4   | 119.45  | 113.57  | 104.22  | 113.05  | 104.32  | 115.09  | 0.001  |
|                      |          |              | 75-79   | 255.79  | 264.71  | 258.39  | 262.29  | 271.96  | 264.86  | 259.85  | 297.95  | 285.21  | 308.52  | 272.4   | <0.001 |
|                      |          |              | 80-84   | 485.99  | 490.81  | 479.62  | 466.23  | 510.86  | 538.25  | 607.01  | 525.27  | 540.02  | 475.06  | 511.78  | <0.001 |
|                      |          |              | ≥85     | 720.61  | 745.45  | 792.37  | 924.5   | 868.51  | 904.76  | 997.94  | 980.44  | 1033.2  | 986.38  | 911.42  | <0.001 |
| Women                | No       | 70-74        | 37.79   | 34.39   | 36.32   | 32.45   | 33.88   | 33.13   | 32.38   | 28.49   | 31.86   | 28.86   | 33.12   | <0.001  |        |
|                      |          | 75-79        | 109.37  | 115.35  | 99.22   | 98.06   | 112.88  | 100.08  | 108.01  | 108.95  | 100.4   | 100.98  | 105.16  | 0.118   |        |
|                      |          | 80-84        | 301.13  | 309.31  | 283.44  | 298.72  | 313.54  | 293.75  | 302.52  | 298.33  | 323.16  | 291.05  | 301.48  | 0.593   |        |
|                      |          | ≥85          | 606.23  | 744.35  | 774.9   | 856.96  | 799.7   | 716.21  | 774.61  | 805.93  | 842.19  | 808.91  | 776.52  | <0.001  |        |
|                      | Yes      | 70-74        | 125.2   | 148.93  | 174.96  | 172.02  | 157.77  | 162.02  | 131.58  | 107.16  | 112.02  | 81.61   | 133.06  | <0.001  |        |
|                      |          | 75-79        | 277.62  | 303.68  | 327.3   | 300.46  | 315.38  | 309.76  | 321.37  | 327.01  | 308.12  | 274.08  | 306.61  | 0.894   |        |
|                      |          | 80-84        | 877.79  | 782.59  | 759.27  | 774.24  | 699.39  | 723.21  | 743.62  | 719.43  | 732.64  | 689.29  | 741.21  | <0.001  |        |
|                      |          | ≥85          | 1040.53 | 1219.07 | 1441.66 | 1588.68 | 1556.53 | 1483.56 | 1505.36 | 1353.57 | 1369.1  | 1211.87 | 1369.63 | 0.660   |        |
|                      |          | Both         | 70-74   | 54.69   | 54.57   | 58.26   | 54.53   | 55.15   | 57.15   | 50.87   | 46.35   | 50.05   | 42.92   | 52.55   | <0.001 |
|                      |          |              | 75-79   | 148.33  | 155.72  | 144.78  | 138.49  | 155     | 145.38  | 154.11  | 156.25  | 145.46  | 138.68  | 148.16  | 0.375  |
|                      |          |              | 80-84   | 393.36  | 390.19  | 369.13  | 384.36  | 389.4   | 384.61  | 395.84  | 389.45  | 411.76  | 378.94  | 388.82  | 0.246  |
|                      |          |              | ≥85     | 683.25  | 831.01  | 900.4   | 994.69  | 936.14  | 850.43  | 902.43  | 916.84  | 948.9   | 899.74  | 890.19  | <0.001 |

*Adjusted incidence per 100,000 inhabitants. P value for time trend using Poisson regression*

## SUPPLEMENTARY METHODS

We calculated the adjusted incidence of discharge rates after vascular dementia (VaD) for men and women with and without type 2 diabetes (T2DM) per 100,000 inhabitants by age groups and overall. To do so we used the Spanish populations for each year studied according to the Spanish National Statistics Institute as reported on December 31 of each year. [1]. To stratify the population according to diabetes status we used data obtained from National Health Surveys (NHS) conducted in 2003/4, 2006/7, 2009/10 and 2011/12 and data from Di@bet.es Study.[2, 3] All these surveys allow us to have an accurate prevalence estimation of diabetes by sex and age groups.[4] Then we multiply the prevalence of diabetes for each sex- age group and year by the Spanish population that same year to obtain the people with and without diabetes.

From 2001 till 2012, Spanish NHS has been done every two or three years. We estimated a rate fitting model using linear regression with prevalences of diabetes from years 2003/4, 2006/7, 2009/10 and 2011/12 when NHS was available. Then we used this model to impute prevalences and to estimate the population suffering diabetes by sex and age groups for those years when NHS was not conducted, those are years 2005, 2008 and 2013.

Once this was done we used the direct standardization method to calculate the adjusted incidences for each diabetes status stratified by age groups and sex using the Spanish population for year 2013 as standard.

We only use standardization methods for incidences. The proportions of clinical conditions and diagnosis and therapeutic procedures are not adjusted. The values shown in the results are the observed prevalence, calculated by dividing the number of subject with these conditions or procedures by the number of observed vascular dementia admission for the year studied.

1  
2  
3 Clinical characteristics included information on overall comorbidity at the time of  
4 diagnosis, which was assessed by calculating the Charlson Comorbidity Index (CCI).

5  
6 [5] The index applies to 17 disease categories, the scores of which are added to obtain  
7 an overall score for each patient. We divided patients into three categories: low index,  
8 which corresponds to patients with no previously recorded disease or with one disease  
9 category; medium index, patients with two categories; and high index, patients with  
10 three or more disease categories.  
11  
12

13 To calculate the CCI we used 15 disease categories, excluding diabetes and dementia as  
14 described by Thomsen et al. [6]  
15  
16

### 17 **Statistical analysis**

18  
19 A descriptive statistical analysis was performed for all continuous variables and  
20 categories by stratifying discharges for vascular dementia according to diabetes status  
21 and sex. Variables are shown as proportions, means with standard deviations or medians  
22 with interquartile ranges (LOHS). Bivariate analyses of variables according to year was  
23 using  $\chi^2$  linear trend analysis (proportions), ANOVA (means) and Kruskal-Wallis test  
24 (medians), as appropriate. To assess differences between those men and women with  
25 and without T2DM, for each year and for the total sample, the statistical tests conducted  
26 for continuous variables were the T test for normal distributions and the Mann–Whitney  
27 test for non-normal distributions and categorical variables were compared using the  
28 linear Chi-square test.  
29  
30  
31  
32  
33  
34  
35  
36  
37  
38  
39  
40  
41  
42  
43  
44  
45  
46  
47  
48  
49

50 In order to test the linear time trend in the incidence due to VaD, we fitted separate  
51 Poisson regression models for men and women with and without T2DM, using year of  
52 discharge, age, CCI, hypertension, atrial fibrillation, infectious complications,  
53 malnutrition, agitation, diagnostic and therapeutic procedures and readmission as  
54 independent variables. So that estimates correspond to Incidence Rate Ratio (IRR) with  
55  
56  
57  
58  
59  
60

1  
2  
3 their 95% confidence intervals. The inclusion of year of discharge allow us to estimate  
4  
5 the average yearly rate of change.  
6  
7

8 For IHM, logistic regression analyses were performed for men and women with  
9  
10 mortality as a binary outcome for those with and without diabetes and for the entire  
11  
12 population to assess the influence of diabetes on IHM. The independent variables  
13  
14 included in the model were those that showed a significant association in the bivariate  
15  
16 analysis or considered relevant in the medical literature.  
17  
18

19 Statistical analyses were performed using Stata version 10.1 (Stata, College Station,  
20  
21 Texas, USA). Statistical significance was set at  $p < 0.05$  (2-tailed).  
22  
23  
24  
25  
26

## 27 REFERENCES

- 28  
29 1. Instituto Nacional de Estadística. Population estimates 2010. <http://www.ine.es>.  
30  
31 Accessed February 10, 2017.  
32  
33
- 34 2. Ministerio de Sanidad, Servicios Sociales e Igualdad. Encuesta Nacional de Salud de  
35  
36 España. <http://www.msssi.gob.es/estadEstudios/estadisticas/encuestaNacional/>.  
37  
38 Accessed February 10, 2017.  
39  
40
- 41 3. Soriguer F, Goday A, Bosch-Comas A, et al. Prevalence of diabetes mellitus and  
42  
43 impaired glucose regulation in Spain: the Di@bet.es Study. *Diabetologia* 2012; 55:88-  
44  
45 93.  
46  
47
- 48 4. Jiménez-García R, Hernandez-Barrera V, Rodríguez-Rieiro C, et al. Comparison of  
49  
50 self-report influenza vaccination coverage with data from a population based  
51  
52 computerized vaccination registry and factors associated with discordance. *Vaccine*.  
53  
54 2014;32:4386-92.  
55  
56  
57  
58  
59  
60



1  
2  
3 5. Charlson ME, Pompei P, Ales KL, MacKenzie CR. A new method of classifying  
4 prognostic comorbidity in longitudinal studies: development and validation. *J Chronic*  
5  
6 *Dis* 1987;40:373–383.  
7  
8

9  
10 6. Thomsen RW, Nielsen JS, Ulrichsen SP, Pedersen L, Hansen AM, Nilsson T. The  
11  
12 Danish Centre for Strategic Research in Type 2 Diabetes (DD2) study: Collection of  
13  
14 baseline data from the first 580 patients. *Clin Epidemiol* 2012; 4:43-48.  
15  
16  
17  
18  
19  
20  
21  
22  
23  
24  
25  
26  
27  
28  
29  
30  
31  
32  
33  
34  
35  
36  
37  
38  
39  
40  
41  
42  
43  
44  
45  
46  
47  
48  
49  
50  
51  
52  
53  
54  
55  
56  
57  
58  
59  
60

For peer review only

STROBE 2007 (v4) Statement—Checklist of items that should be included in reports of *cross-sectional studies*

| Section/Topic                | Item # | Recommendation                                                                                                                                                                       | Reported on page #    |
|------------------------------|--------|--------------------------------------------------------------------------------------------------------------------------------------------------------------------------------------|-----------------------|
| Title and abstract           | 1      | (a) Indicate the study's design with a commonly used term in the title or the abstract                                                                                               | 1,2,3                 |
|                              |        | (b) Provide in the abstract an informative and balanced summary of what was done and what was found                                                                                  | 2,3                   |
| <b>Introduction</b>          |        |                                                                                                                                                                                      |                       |
| Background/rationale         | 2      | Explain the scientific background and rationale for the investigation being reported                                                                                                 | 4                     |
| Objectives                   | 3      | State specific objectives, including any prespecified hypotheses                                                                                                                     | 4                     |
| <b>Methods</b>               |        |                                                                                                                                                                                      |                       |
| Study design                 | 4      | Present key elements of study design early in the paper                                                                                                                              | 4,5                   |
| Setting                      | 5      | Describe the setting, locations, and relevant dates, including periods of recruitment, exposure, follow-up, and data collection                                                      | 4,5                   |
| Participants                 | 6      | (a) Give the eligibility criteria, and the sources and methods of selection of participants                                                                                          | 4,5                   |
| Variables                    | 7      | Clearly define all outcomes, exposures, predictors, potential confounders, and effect modifiers. Give diagnostic criteria, if applicable                                             | 4,5                   |
| Data sources/<br>measurement | 8*     | For each variable of interest, give sources of data and details of methods of assessment (measurement). Describe comparability of assessment methods if there is more than one group | 4,5                   |
| Bias                         | 9      | Describe any efforts to address potential sources of bias                                                                                                                            | Supplementary methods |
| Study size                   | 10     | Explain how the study size was arrived at                                                                                                                                            | 4,5                   |
| Quantitative variables       | 11     | Explain how quantitative variables were handled in the analyses. If applicable, describe which groupings were chosen and why                                                         | Supplementary methods |
| Statistical methods          | 12     | (a) Describe all statistical methods, including those used to control for confounding                                                                                                | Supplementary methods |
|                              |        | (b) Describe any methods used to examine subgroups and interactions                                                                                                                  | Supplementary methods |
|                              |        | (c) Explain how missing data were addressed                                                                                                                                          | Supplementary         |

|                          |     |                                                                                                                                                                                                              |         |
|--------------------------|-----|--------------------------------------------------------------------------------------------------------------------------------------------------------------------------------------------------------------|---------|
|                          |     |                                                                                                                                                                                                              | methods |
|                          |     | (d) If applicable, describe analytical methods taking account of sampling strategy                                                                                                                           |         |
|                          |     | (e) Describe any sensitivity analyses                                                                                                                                                                        |         |
| <b>Results</b>           |     |                                                                                                                                                                                                              |         |
| Participants             | 13* | (a) Report numbers of individuals at each stage of study—eg numbers potentially eligible, examined for eligibility, confirmed eligible, included in the study, completing follow-up, and analysed            | 5-16    |
|                          |     | (b) Give reasons for non-participation at each stage                                                                                                                                                         |         |
|                          |     | (c) Consider use of a flow diagram                                                                                                                                                                           |         |
| Descriptive data         | 14* | (a) Give characteristics of study participants (eg demographic, clinical, social) and information on exposures and potential confounders                                                                     | 5-16    |
|                          |     | (b) Indicate number of participants with missing data for each variable of interest                                                                                                                          |         |
| Outcome data             | 15* | Report numbers of outcome events or summary measures                                                                                                                                                         | 5-16    |
| Main results             | 16  | (a) Give unadjusted estimates and, if applicable, confounder-adjusted estimates and their precision (eg, 95% confidence interval). Make clear which confounders were adjusted for and why they were included | 5-16    |
|                          |     | (b) Report category boundaries when continuous variables were categorized                                                                                                                                    | 5-16    |
|                          |     | (c) If relevant, consider translating estimates of relative risk into absolute risk for a meaningful time period                                                                                             |         |
| Other analyses           | 17  | Report other analyses done—eg analyses of subgroups and interactions, and sensitivity analyses                                                                                                               |         |
| <b>Discussion</b>        |     |                                                                                                                                                                                                              |         |
| Key results              | 18  | Summarise key results with reference to study objectives                                                                                                                                                     | 16-18   |
| Limitations              | 19  | Discuss limitations of the study, taking into account sources of potential bias or imprecision. Discuss both direction and magnitude of any potential bias                                                   | 16-18   |
| Interpretation           | 20  | Give a cautious overall interpretation of results considering objectives, limitations, multiplicity of analyses, results from similar studies, and other relevant evidence                                   | 16-18   |
| Generalisability         | 21  | Discuss the generalisability (external validity) of the study results                                                                                                                                        | 19      |
| <b>Other information</b> |     |                                                                                                                                                                                                              |         |
| Funding                  | 22  | Give the source of funding and the role of the funders for the present study and, if applicable, for the original study on which the present article is based                                                | 20      |

\*Give information separately for cases and controls in case-control studies and, if applicable, for exposed and unexposed groups in cohort and cross-sectional studies.

1  
2  
3  
4 **Note:** An Explanation and Elaboration article discusses each checklist item and gives methodological background and published examples of transparent reporting. The STROBE  
5 checklist is best used in conjunction with this article (freely available on the Web sites of PLoS Medicine at <http://www.plosmedicine.org/>, Annals of Internal Medicine at  
6 <http://www.annals.org/>, and Epidemiology at <http://www.epidem.com/>). Information on the STROBE Initiative is available at [www.strobe-statement.org](http://www.strobe-statement.org).  
7  
8  
9  
10  
11  
12  
13  
14  
15  
16  
17  
18  
19  
20  
21  
22  
23  
24  
25  
26  
27  
28  
29  
30  
31  
32  
33  
34  
35  
36  
37  
38  
39  
40  
41  
42  
43  
44  
45  
46  
47  
48  
49

For peer review only
