# Supplementary material for: Observational study of vascular dementia in the Spanish elderly population according to type 2 diabetes status: trends in incidence, characteristics and outcomes (2004-2013)
Source: PubMed Central journal article supplement — BMJ Open. 2017 Aug 4;7(8):e016390. doi: 10.1136/bmjopen-2017-016390 (PMC5629725; doi:10.1136/bmjopen-2017-016390), 2017-08-04
Supplement: bmjopen-2017-016390supp002.pdf [file bmjopen-2017-016390supp002.pdf]

**Supplementary Table. Incidence of hospitalizations with vascular dementia among people with and without type 2 diabetes according to sex and age groups. Analysis of the Spanish National Hospital Discharge Database from 2004 to 2013.**

| Rate*<br>100.000/Inh | Diabetes | Age<br>group | 2004    | 2005    | 2006    | 2007    | 2008    | 2009    | 2010    | 2011    | 2012    | 2013    | Total   | p-value |        |
|----------------------|----------|--------------|---------|---------|---------|---------|---------|---------|---------|---------|---------|---------|---------|---------|--------|
| Men                  | No       | 70-74        | 94.44   | 89.32   | 81.36   | 84.92   | 95.68   | 82.91   | 83.57   | 68.93   | 79.45   | 74.1    | 83.66   | <0.001  |        |
|                      |          | 75-79        | 210.88  | 211.6   | 198.33  | 191.4   | 208.25  | 202.8   | 201.93  | 247.69  | 216.9   | 260.87  | 213.09  | <0.001  |        |
|                      |          | 80-84        | 436.5   | 423.05  | 390.5   | 389.72  | 413.81  | 429.29  | 485.58  | 437.61  | 430.23  | 392.87  | 421.69  | 0.372   |        |
|                      |          | ≥85          | 652.21  | 689.83  | 753.13  | 862.05  | 789.82  | 834.04  | 895.58  | 866.84  | 903.98  | 886.14  | 824.15  | <0.001  |        |
|                      | Yes      | 70-74        | 220.31  | 245.77  | 266.13  | 243.04  | 247.71  | 252.27  | 222.66  | 237.99  | 240.44  | 223.93  | 240.19  | 0.341   |        |
|                      |          | 75-79        | 437.4   | 496.19  | 538.43  | 592.83  | 527.72  | 482.81  | 463.28  | 434.65  | 471.01  | 407.09  | 479.19  | <0.001  |        |
|                      |          | 80-84        | 684.81  | 788.86  | 901.56  | 828.49  | 945.7   | 1000.27 | 1121.94 | 864.39  | 964.72  | 773.21  | 887.28  | 0.001   |        |
|                      |          | ≥85          | 1191.79 | 1032.39 | 954.29  | 1182.21 | 1218.95 | 1239.99 | 1483.13 | 1473.93 | 1594.54 | 1393.17 | 1308.71 | <0.001  |        |
|                      |          | Both         | 70-74   | 118.32  | 119.00  | 116.41  | 114.92  | 126.4   | 119.45  | 113.57  | 104.22  | 113.05  | 104.32  | 115.09  | 0.001  |
|                      |          |              | 75-79   | 255.79  | 264.71  | 258.39  | 262.29  | 271.96  | 264.86  | 259.85  | 297.95  | 285.21  | 308.52  | 272.4   | <0.001 |
|                      |          |              | 80-84   | 485.99  | 490.81  | 479.62  | 466.23  | 510.86  | 538.25  | 607.01  | 525.27  | 540.02  | 475.06  | 511.78  | <0.001 |
|                      |          |              | ≥85     | 720.61  | 745.45  | 792.37  | 924.5   | 868.51  | 904.76  | 997.94  | 980.44  | 1033.2  | 986.38  | 911.42  | <0.001 |
| Women                | No       | 70-74        | 37.79   | 34.39   | 36.32   | 32.45   | 33.88   | 33.13   | 32.38   | 28.49   | 31.86   | 28.86   | 33.12   | <0.001  |        |
|                      |          | 75-79        | 109.37  | 115.35  | 99.22   | 98.06   | 112.88  | 100.08  | 108.01  | 108.95  | 100.4   | 100.98  | 105.16  | 0.118   |        |
|                      |          | 80-84        | 301.13  | 309.31  | 283.44  | 298.72  | 313.54  | 293.75  | 302.52  | 298.33  | 323.16  | 291.05  | 301.48  | 0.593   |        |
|                      |          | ≥85          | 606.23  | 744.35  | 774.9   | 856.96  | 799.7   | 716.21  | 774.61  | 805.93  | 842.19  | 808.91  | 776.52  | <0.001  |        |
|                      | Yes      | 70-74        | 125.2   | 148.93  | 174.96  | 172.02  | 157.77  | 162.02  | 131.58  | 107.16  | 112.02  | 81.61   | 133.06  | <0.001  |        |
|                      |          | 75-79        | 277.62  | 303.68  | 327.3   | 300.46  | 315.38  | 309.76  | 321.37  | 327.01  | 308.12  | 274.08  | 306.61  | 0.894   |        |
|                      |          | 80-84        | 877.79  | 782.59  | 759.27  | 774.24  | 699.39  | 723.21  | 743.62  | 719.43  | 732.64  | 689.29  | 741.21  | <0.001  |        |
|                      |          | ≥85          | 1040.53 | 1219.07 | 1441.66 | 1588.68 | 1556.53 | 1483.56 | 1505.36 | 1353.57 | 1369.1  | 1211.87 | 1369.63 | 0.660   |        |
|                      |          | Both         | 70-74   | 54.69   | 54.57   | 58.26   | 54.53   | 55.15   | 57.15   | 50.87   | 46.35   | 50.05   | 42.92   | 52.55   | <0.001 |
|                      |          |              | 75-79   | 148.33  | 155.72  | 144.78  | 138.49  | 155     | 145.38  | 154.11  | 156.25  | 145.46  | 138.68  | 148.16  | 0.375  |
|                      |          |              | 80-84   | 393.36  | 390.19  | 369.13  | 384.36  | 389.4   | 384.61  | 395.84  | 389.45  | 411.76  | 378.94  | 388.82  | 0.246  |
|                      |          |              | ≥85     | 683.25  | 831.01  | 900.4   | 994.69  | 936.14  | 850.43  | 902.43  | 916.84  | 948.9   | 899.74  | 890.19  | <0.001 |

*Adjusted incidence per 100,000 inhabitants. P value for time trend using Poisson regression*
